# Supplementary material
Source: PubMed Central journal article supplement (PMC7073908)
Supplement: djz122_supplementary_data.pdf [file djz122_supplementary_data.pdf]

## Supplementary Materials

### *Supplementary Methods*

#### **aROC curve analysis of winner's curse**

We evaluated whether the estimated aAUC and aROC may be biased because of the “winner's curse” or using those metabolites most significantly associated with cancer.

We first performed stepwise selection to identify the peaks most strongly associated with liver cancer and, using those peaks, calculated the resulting aAUC and aROC. Note this is a slightly modified and simplified selection procedure and is intended only to evaluate the influence of the winner's curse.

We then estimated the bias in the above estimates of aAUC and aROC using the following steps. We split the data into training (90%) and test (10%) sets, selected metabolites and built the predictor using the training set and estimated the aAUC and aROC using the test set. We repeat this calculation 10x using 10 splits of the data and report the average aAUC and aROC (**Supplementary Figure 5**). Note, the difference between these averages and the overall estimates (based on the entire dataset) reflect the bias from potentially overfitting the model.

**Supplementary Table 1.** Identification of trigonelline and 38 features associated with liver cancer, liver disease mortality and coffee intake.

| Compound # | ID (monoisotopic mass@RT) | Compound name                | MSI identification confidence level | m/z      | RT (min)  | P-value                 |                       |                          |
|------------|---------------------------|------------------------------|-------------------------------------|----------|-----------|-------------------------|-----------------------|--------------------------|
|            |                           |                              |                                     |          |           | Coffee intake†          | Liver cancer‡         | Liver disease mortality‡ |
| 1          | 449.3132@6.451681*        | Glycochenodeoxycholic acid   | 1                                   | 450.3205 | 6.451681  | 2.69x10 <sup>-14</sup>  | 6.85x10 <sup>-7</sup> | 3.32x10 <sup>-10</sup>   |
| 1          | 471.2943@6.4516096        |                              |                                     | 472.3016 | 6.4516096 | 2.29x10 <sup>-12</sup>  | 9.98x10 <sup>-7</sup> | 1.52x10 <sup>-9</sup>    |
| 2          | 465.3082@6.1825604*       | Glycocholic acid             | 1                                   | 466.3155 | 6.1825604 | 2.23x10 <sup>-8</sup>   | 6.63x10 <sup>-8</sup> | 1.57x10 <sup>-7</sup>    |
| 2          | 482.3352@6.181003         |                              |                                     | 483.3425 | 6.181003  | 8.73x10 <sup>-9</sup>   | 1.31x10 <sup>-6</sup> | 4.19x10 <sup>-7</sup>    |
| 2          | 518.2202@6.1818233        |                              |                                     | 519.2275 | 6.1818233 | 1.15x10 <sup>-7</sup>   | 5.98x10 <sup>-6</sup> | 1.87x10 <sup>-7</sup>    |
| 3          | 136.0382@0.86198366*      | Hypoxanthine                 | 1                                   | 137.0455 | 0.8620    | 1.05x10 <sup>-7</sup>   | 1.19x10 <sup>-7</sup> | 1.98x10 <sup>-6</sup>    |
| 4          | 159.0675@1.5374656*       | Serotonin                    | 1                                   | 160.0748 | 1.5374656 | 8.44x10 <sup>-8</sup>   | 1.17x10 <sup>-5</sup> | 1.25x10 <sup>-7</sup>    |
| 5          | 181.0767@1.275114*        | Tyrosine                     | 1                                   | 182.0840 | 1.2751    | 1.84x10 <sup>-6</sup>   | 5.75x10 <sup>-7</sup> | 4.08x10 <sup>-7</sup>    |
| 5          | 181.0766@0.86087453       |                              |                                     | 182.0839 | 0.8609    | 4.75x10 <sup>-8</sup>   | 3.91x10 <sup>-8</sup> | 3.23x10 <sup>-9</sup>    |
| 5          | 135.0678@0.86145175       |                              |                                     | 136.0751 | 0.8615    | 1.72x10 <sup>-8</sup>   | 7.10x10 <sup>-8</sup> | 2.47x10 <sup>-9</sup>    |
| 5          | 118.042@0.8618372         |                              |                                     | 119.0493 | 0.8618    | 3.01x10 <sup>-7</sup>   | 2.45x10 <sup>-7</sup> | 2.11x10 <sup>-9</sup>    |
| 5          | 164.0467@0.86240983       |                              |                                     | 165.0540 | 0.8624    | 1.25x10 <sup>-9</sup>   | 4.89x10 <sup>-8</sup> | 8.78x10 <sup>-10</sup>   |
| 5          | 135.0673@1.2750853        |                              |                                     | 136.0746 | 1.2751    | 5.63x10 <sup>-6</sup>   | 4.58x10 <sup>-6</sup> | 4.77x10 <sup>-7</sup>    |
| 6          | 545.7893@6.9137807        | LysoPC(18:2)                 | 2                                   | 546.7966 | 6.9137807 | 9.08x10 <sup>-11</sup>  | 3.96x10 <sup>-8</sup> | 4.40x10 <sup>-9</sup>    |
| 6          | 286.1276@6.9126344        |                              |                                     | 287.1349 | 6.9126344 | 7.70x10 <sup>-10</sup>  | 1.90x10 <sup>-7</sup> | 1.62x10 <sup>-8</sup>    |
| 6          | 538.8086@6.914731*        |                              |                                     | 539.8159 | 6.914731  | 1.39x10 <sup>-8</sup>   | 4.06x10 <sup>-7</sup> | 5.31x10 <sup>-10</sup>   |
| 6          | 806.4585@6.9148936        |                              |                                     | 807.4658 | 6.9148936 | 1.45x10 <sup>-7</sup>   | 8.19x10 <sup>-8</sup> | 4.10x10 <sup>-9</sup>    |
| 6          | 538.3067@6.915277         |                              |                                     | 539.3140 | 6.915277  | 1.58x10 <sup>-6</sup>   | 1.24x10 <sup>-6</sup> | 4.43x10 <sup>-6</sup>    |
| 6          | 805.9551@6.9153476        |                              |                                     | 806.9624 | 6.9153476 | 4.72x10 <sup>-10</sup>  | 2.64x10 <sup>-7</sup> | 4.39x10 <sup>-9</sup>    |
| 6          | 798.4699@6.916353         |                              |                                     | 799.4772 | 6.916353  | 3.59x10 <sup>-10</sup>  | 5.30x10 <sup>-8</sup> | 3.65x10 <sup>-9</sup>    |
| 6          | 797.9663@6.9167204        |                              |                                     | 798.9736 | 6.9167204 | 6.44x10 <sup>-11</sup>  | 2.74x10 <sup>-8</sup> | 2.75x10 <sup>-8</sup>    |
| 7          | 481.3229@6.8804502*       | LysoPC(15:0)                 | 2                                   | 482.3302 | 6.8804502 | <1.11x10 <sup>-16</sup> | 4.33x10 <sup>-8</sup> | 5.96x10 <sup>-10</sup>   |
| 8          | 479.3426@7.109446*        | LysoPC(P-16:0)               | 2                                   | 480.3499 | 7.109446  | 4.82x10 <sup>-11</sup>  | 7.63x10 <sup>-8</sup> | 3.16x10 <sup>-7</sup>    |
| 9          | 230.1626@2.280263*        | Dipeptide: Leu-Val or isomer | 3                                   | 231.1699 | 2.280263  | 4.32x10 <sup>-7</sup>   | 1.15x10 <sup>-5</sup> | 1.07x10 <sup>-6</sup>    |
| 10         | 481.3495@7.157514*        | Unknown                      | 4                                   | 482.3568 | 7.157514  | 5.77x10 <sup>-15</sup>  | 1.01x10 <sup>-7</sup> | 1.57x10 <sup>-7</sup>    |
| 11         | 124.0638@2.238123*        | Unknown                      | 4                                   | 125.0711 | 2.238123  | <1.11x10 <sup>-16</sup> | 6.59x10 <sup>-6</sup> | 1.10x10 <sup>-6</sup>    |
| 12         | 249.0052@2.7640297        | Unknown                      | 4                                   | 250.0125 | 2.7640297 | <1.11x10 <sup>-16</sup> | 1.15x10 <sup>-5</sup> | 5.65x10 <sup>-11</sup>   |

|    |                      |              |   |          |           |                         |                        |                        |
|----|----------------------|--------------|---|----------|-----------|-------------------------|------------------------|------------------------|
| 12 | 202.0168@2.7641954*  |              |   | 203.0241 | 2.7641954 | <1.11x10 <sup>-16</sup> | 3.78x10 <sup>-6</sup>  | 8.74x10 <sup>-11</sup> |
| 13 | 242.1067@4.0267076*  | Unknown      | 4 | 243.1140 | 4.0267076 | 5.01x10 <sup>-14</sup>  | 1.05x10 <sup>-5</sup>  | 1.13x10 <sup>-8</sup>  |
| 14 | 278.076@4.280106*    | Unknown      | 4 | 279.0833 | 4.280106  | 9.86x10 <sup>-10</sup>  | 1.65x10 <sup>-6</sup>  | 1.20x10 <sup>-7</sup>  |
| 14 | 238.0836@4.280605    |              |   | 239.0909 | 4.280605  | 9.15x10 <sup>-10</sup>  | 1.93x10 <sup>-10</sup> | 1.04x10 <sup>-9</sup>  |
| 15 | 356.1964@5.496086*   | Unknown      | 4 | 357.2037 | 5.496086  | <1.11x10 <sup>-16</sup> | 1.69x10 <sup>-6</sup>  | 2.47x10 <sup>-7</sup>  |
| 16 | 388.2573@6.339673*   | Unknown      | 4 | 389.2646 | 6.339673  | 5.44x10 <sup>-6</sup>   | 3.05x10 <sup>-6</sup>  | 4.30x10 <sup>-8</sup>  |
| 17 | 504.3029@6.8187194*  | Unknown      | 4 | 505.3102 | 6.8187194 | <1.11x10 <sup>-16</sup> | 5.46x10 <sup>-6</sup>  | 6.31x10 <sup>-12</sup> |
| 18 | 793.9569@6.9292555*  | Unknown      | 4 | 794.9642 | 6.9292555 | 1.23x10 <sup>-11</sup>  | 1.34x10 <sup>-5</sup>  | 3.98x10 <sup>-6</sup>  |
| 19 | 292.9962@0.6360238*  | Unknown      | 4 | 294.0035 | 0.6360    | 2.76x10 <sup>-10</sup>  | 1.68x10 <sup>-6</sup>  | 7.99x10 <sup>-8</sup>  |
| 20 | 162.0534@0.64166015* | Unknown      | 4 | 163.0607 | 0.6417    | 6.09x10 <sup>-7</sup>   | 1.53x10 <sup>-7</sup>  | 4.83x10 <sup>-7</sup>  |
| 21 | 202.1313@0.8667429*  | Unknown      | 4 | 203.1386 | 0.8667    | 2.76x10 <sup>-10</sup>  | 3.53x10 <sup>-6</sup>  | 2.30x10 <sup>-6</sup>  |
| 22 | 159.0292@0.6753366*  | Trigonelline | 1 | 160.0365 | 0.6753    | <1.11x10 <sup>-16</sup> | 4.68x10 <sup>-5</sup>  | 3.07x10 <sup>-8</sup>  |

\* Indicates the main feature that was used to estimate associations with outcomes of interest.

†P-values were estimated from linear regression models treating a given spectral feature as the (log<sub>2</sub>-transformed) continuous response variable and coffee consumption (continuous, g/day) as the exposure variable. Models were adjusted for age, smoking intensity (cigarettes/day), run order and the surrogate variables identified by SVA and observations from both case-control sets was used (N=940). Statistical tests were two-sided.

‡P-values were estimated from conditional logistic regression models treating case status, liver cancer (n=221 cases; n=221 controls) or liver disease death (n=242 cases; n=242 controls), as the response variable and a given spectral feature as the (log<sub>2</sub>-transformed) continuous exposure variable. Models were adjusted for age, smoking intensity (cigarettes/day) and run order. Statistical tests were two-sided.

Abbreviations: MSI, Metabolomics Standards Initiative; RT, retention time

**Supplementary Table 2.** Odds ratios and 95% confidence intervals for incident liver cancer comparing men in the 90<sup>th</sup> and 10<sup>th</sup> percentiles, based on the distribution in controls, for top unknown metabolites, using conditional logistic regression

| Direction of association         | Metabolite No. (mass@RT)        | Unadjusted model  | Model 1 †         | >0 to 10 years of follow-up (model 1) †‡ | >10 years of follow-up (model 1) †§ | Model 2 (diet adjusted) † |
|----------------------------------|---------------------------------|-------------------|-------------------|------------------------------------------|-------------------------------------|---------------------------|
| Increased risk                   | Unknown 12 (202.0168@2.7641954) |                   |                   |                                          |                                     |                           |
|                                  | OR (95% CI) *                   | 3.71 (2.15-6.42)  | 3.61 (1.92-6.79)  | 7.02 (1.40-35.10)                        | 3.26 (1.51-7.00)                    | 3.05 (1.53-6.11)          |
|                                  | P-value¶                        | <0.001            | <0.001            | 0.02                                     | 0.003                               | 0.002                     |
|                                  | Unknown 13 (242.1067@4.0267076) |                   |                   |                                          |                                     |                           |
|                                  | OR (95% CI) *                   | 3.23 (2.00-5.22)  | 2.93 (1.71-5.02)  | 3.58 (1.13-11.33)                        | 3.66 (1.78-7.55)                    | 2.55 (1.42-4.56)          |
|                                  | P-value¶                        | <0.001            | <0.001            | 0.03                                     | <0.001                              | 0.002                     |
|                                  | Unknown 16 (388.2573@6.339673)  |                   |                   |                                          |                                     |                           |
|                                  | OR (95% CI) *                   | 5.51 (2.75-11.07) | 4.93 (2.32-10.48) | 4.83 (1.04-22.43)                        | 6.36 (2.35-17.20)                   | 4.64 (2.04-10.57)         |
|                                  | P-value¶                        | <0.001            | <0.001            | 0.04                                     | <0.001                              | <0.001                    |
|                                  | Unknown 17 (504.3029@6.8187194) |                   |                   |                                          |                                     |                           |
|                                  | OR (95% CI) *                   | 3.07 (1.90-4.94)  | 3.31 (1.87-5.86)  | 3.01 (0.87-10.36)                        | 3.99 (1.89-8.44)                    | 3.29 (1.73-6.24)          |
|                                  | P-value¶                        | <0.001            | <0.001            | 0.08                                     | <0.001                              | <0.001                    |
|                                  | Unknown 19 (292.9962@0.6360238) |                   |                   |                                          |                                     |                           |
|                                  | OR (95% CI) *                   | 5.18 (2.82-9.51)  | 4.21 (2.15-8.23)  | 9.15 (1.73-48.34)                        | 4.31 (1.88-9.88)                    | 5.21 (2.40-11.34)         |
| P-value¶                         | <0.001                          | <0.001            | 0.01              | <0.001                                   | <0.001                              |                           |
| Unknown 20 (162.0534@0.64166015) |                                 |                   |                   |                                          |                                     |                           |
| OR (95% CI) *                    | 8.32 (3.96-17.46)               | 6.77 (2.94-15.56) | 8.60 (1.79-41.45) | 9.00 (3.07-26.38)                        | 7.03 (2.91-16.97)                   |                           |
| P-value¶                         | <0.001                          | <0.001            | 0.01              | <0.001                                   | <0.001                              |                           |
| Decreased risk                   | Unknown 10 (481.3495@7.157514)  |                   |                   |                                          |                                     |                           |
|                                  | OR (95% CI) *                   | 0.08 (0.03-0.18)  | 0.12 (0.05-0.29)  | 0.004 (<0.001-0.08)                      | 0.22 (0.08-0.61)                    | 0.12 (0.04-0.32)          |
|                                  | P-value¶                        | <0.001            | <0.001            | <0.001                                   | <0.001                              | <0.001                    |
|                                  | Unknown 11 (124.0638@2.238123)  |                   |                   |                                          |                                     |                           |
|                                  | OR (95% CI) *                   | 0.31 (0.19-0.51)  | 0.30 (0.17-0.55)  | 0.07 (0.01-0.40)                         | 0.42 (0.21-0.83)                    | 0.31 (0.15-0.66)          |
|                                  | P-value¶                        | <0.001            | <0.001            | 0.003                                    | 0.01                                | 0.002                     |
|                                  | Unknown 14 (278.076@4.280106)   |                   |                   |                                          |                                     |                           |
|                                  | OR (95% CI) *                   | 0.41 (0.29-0.58)  | 0.39 (0.26-0.57)  | 0.45 (0.22-0.92)                         | 0.35 (0.21-0.57)                    | 0.30 (0.19-0.47)          |
|                                  | P-value¶                        | <0.001            | <0.001            | 0.03                                     | <0.001                              | <0.001                    |
|                                  | Unknown 15 (356.1964@5.496086)  |                   |                   |                                          |                                     |                           |
|                                  | OR (95% CI) *                   | 0.31 (0.19-0.50)  | 0.27 (0.16-0.48)  | 0.27 (0.09-0.80)                         | 0.24 (0.11-0.50)                    | 0.29 (0.16-0.55)          |
|                                  | P-value¶                        | <0.001            | <0.001            | 0.02                                     | <0.001                              | <0.001                    |
|                                  | Unknown 18 (793.9569@6.9292555) |                   |                   |                                          |                                     |                           |
|                                  | OR (95% CI) *                   | 0.26 (0.15-0.44)  | 0.28 (0.15-0.52)  | 0.03 (0.004-0.22)                        | 0.48 (0.24-0.96)                    | 0.31 (0.16-0.61)          |
| P-value¶                         | <0.001                          | <0.001            | <0.001            | 0.04                                     | <0.001                              |                           |
| Unknown 21 (202.1313@0.8667429)  |                                 |                   |                   |                                          |                                     |                           |
| OR (95% CI) *                    | 0.22 (0.12-0.42)                | 0.20 (0.10-0.41)  | 0.21 (0.05-0.90)  | 0.14 (0.06-0.36)                         | 0.20 (0.09-0.42)                    |                           |
| P-value¶                         | <0.001                          | <0.001            | 0.04              | <0.001                                   | <0.001                              |                           |

\* ORs for 221 liver cancer cases and 221 matched controls compare the 90<sup>th</sup> to the 10<sup>th</sup> percentile of metabolite values based on the distribution in the controls; letting  $X_{90}$  and  $X_{10}$ , denote the 90<sup>th</sup> percentile and 10<sup>th</sup> percentile in controls, and  $\beta$  denoted the log(OR) from the conditional logistic regression model, the OR is  $e^{\beta(X_{90}-X_{10})}$

† Models adjusted for entry age (years), body mass index (kg/m<sup>2</sup>), smoking intensity (cigarettes/day), smoking duration (years), alcohol intake (none, <11.6 g/day, ≥11.6 g/day, or missing), self-reported diabetes status (yes or no), education (≤ or > elementary education), and run order

‡ n=146 (73 cases; 73 matched controls); missing alcohol assigned to highest frequency category owing to unstable risk estimates

§ n=296 (148 cases; 148 matched controls)

|| Models additionally adjusted for coffee intake (none, <1, 1 to <2, 2 to <3, or  $\geq 3$  cups (8 oz) per day), fruit and vegetable intake (g/1000 kcal), red meat intake (g/1000 kcal), white meat intake (g/1000 kcal), processed meat intake (g/1000 kcal), fish intake (g/1000 kcal), saturated fat intake (g/1000 kcal), energy intake (kcal); subjects with missing FFQ data were grouped using an indicator variable for missing

¶ P-value for  $X^2$  test obtained from conditional logistic regression model for a given metabolite (modeled on a continuous basis); all tests were two-sided.

Abbreviations: CI, confidence interval; OR, odds ratio; RT, retention time

**Supplementary Table 3.** Odds ratios and 95% confidence intervals for liver disease death comparing men in the 90<sup>th</sup> and 10<sup>th</sup> percentiles, based on the distribution in controls, for top unknown metabolites, using conditional logistic regression

| Direction of association         | Metabolite No. (mass@RT)        | Unadjusted model  | Model 1 †          | >0 to 10 years of follow-up (model 1) †‡ | >10 years of follow-up (model 1) †§ | Model 2 (diet adjusted) † |
|----------------------------------|---------------------------------|-------------------|--------------------|------------------------------------------|-------------------------------------|---------------------------|
| Increased risk                   | Unknown 12 (202.0168@2.7641954) |                   |                    |                                          |                                     |                           |
|                                  | OR (95% CI) *                   | 4.39 (2.82-6.81)  | 3.72 (2.34-5.93)   | 3.82 (1.95-7.50)                         | 3.94 (1.91-8.13)                    | 3.69 (2.18-6.26)          |
|                                  | P-value¶                        | <0.001            | <0.001             | <0.001                                   | <0.001                              | <0.001                    |
|                                  | Unknown 13 (242.1067@4.0267076) |                   |                    |                                          |                                     |                           |
|                                  | OR (95% CI) *                   | 3.69 (2.40-5.66)  | 3.41 (2.14-5.42)   | 3.04 (1.58-5.86)                         | 3.84 (1.90-7.78)                    | 3.04 (1.82-5.07)          |
|                                  | P-value¶                        | <0.001            | <0.001             | <0.001                                   | <0.001                              | <0.001                    |
|                                  | Unknown 16 (388.2573@6.339673)  |                   |                    |                                          |                                     |                           |
|                                  | OR (95% CI) *                   | 7.92 (3.83-16.37) | 10.01 (4.33-23.14) | 59.98 (9.64-372.98)                      | 4.85 (1.60-14.73)                   | 9.91 (4.02-24.40)         |
|                                  | P-value¶                        | <0.001            | <0.001             | <0.001                                   | 0.01                                | <0.001                    |
|                                  | Unknown 17 (504.3029@6.8187194) |                   |                    |                                          |                                     |                           |
|                                  | OR (95% CI) *                   | 5.43 (3.38-8.74)  | 4.61 (2.75-7.74)   | 2.83 (1.42-5.65)                         | 8.41 (3.41-20.73)                   | 4.03 (2.30-7.06)          |
|                                  | P-value¶                        | <0.001            | <0.001             | 0.003                                    | <0.001                              | <0.001                    |
|                                  | Unknown 19 (292.9962@0.6360238) |                   |                    |                                          |                                     |                           |
|                                  | OR (95% CI) *                   | 5.26 (2.89-9.59)  | 5.06 (2.60-9.83)   | 5.84 (2.14-15.91)                        | 5.73 (2.10-15.64)                   | 5.04 (2.46-10.35)         |
| P-value¶                         | <0.001                          | <0.001            | <0.001             | <0.001                                   | <0.001                              |                           |
| Unknown 20 (162.0534@0.64166015) |                                 |                   |                    |                                          |                                     |                           |
| OR (95% CI) *                    | 5.51 (2.90-10.47)               | 6.79 (3.24-14.22) | 7.26 (2.58-20.46)  | 9.59 (2.64-34.82)                        | 7.47 (3.28-17.06)                   |                           |
| P-value¶                         | <0.001                          | <0.001            | <0.001             | <0.001                                   | <0.001                              |                           |
| Decreased risk                   | Unknown 10 (481.3495@7.157514)  |                   |                    |                                          |                                     |                           |
|                                  | OR (95% CI) *                   | 0.16 (0.08-0.31)  | 0.19 (0.09-0.40)   | 0.24 (0.08-0.69)                         | 0.14 (0.05-0.43)                    | 0.22 (0.10-0.50)          |
|                                  | P-value¶                        | <0.001            | <0.001             | 0.01                                     | <0.001                              | <0.001                    |
|                                  | Unknown 11 (124.0638@2.238123)  |                   |                    |                                          |                                     |                           |
|                                  | OR (95% CI) *                   | 0.31 (0.20-0.48)  | 0.37 (0.23-0.58)   | 0.55 (0.31-0.98)                         | 0.22 (0.10-0.50)                    | 0.40 (0.22-0.72)          |
|                                  | P-value¶                        | <0.001            | <0.001             | 0.04                                     | <0.001                              | 0.003                     |
|                                  | Unknown 14 (278.076@4.280106)   |                   |                    |                                          |                                     |                           |
|                                  | OR (95% CI) *                   | 0.47 (0.36-0.61)  | 0.50 (0.38-0.66)   | 0.48 (0.32-0.71)                         | 0.44 (0.27-0.73)                    | 0.50 (0.37-0.69)          |
|                                  | P-value¶                        | <0.001            | <0.001             | 0.003                                    | 0.001                               | <0.001                    |
|                                  | Unknown 15 (356.1964@5.496086)  |                   |                    |                                          |                                     |                           |
|                                  | OR (95% CI) *                   | 0.26 (0.16-0.43)  | 0.32 (0.19-0.54)   | 0.36 (0.15-0.84)                         | 0.32 (.16-0.65)                     | 0.41 (0.23-0.74)          |
|                                  | P-value¶                        | <0.001            | <0.001             | 0.02                                     | 0.002                               | 0.003                     |
|                                  | Unknown 18 (793.9569@6.9292555) |                   |                    |                                          |                                     |                           |
|                                  | OR (95% CI) *                   | 0.34 (0.22-0.53)  | 0.38 (0.24-0.61)   | 0.29 (0.15-0.59)                         | 0.49 (0.23-1.05)                    | 0.42 (0.25-0.71)          |
| P-value¶                         | <0.001                          | <0.001            | <0.001             | 0.07                                     | 0.001                               |                           |
| Unknown 21 (202.1313@0.8667429)  |                                 |                   |                    |                                          |                                     |                           |
| OR (95% CI) *                    | 0.32 (0.20-0.51)                | 0.33 (0.20-0.56)  | 0.41 (0.21-0.79)   | 0.28 (0.12-0.65)                         | 0.40 (0.23-0.70)                    |                           |
| P-value¶                         | <0.001                          | <0.001            | 0.01               | 0.003                                    | 0.001                               |                           |

\* ORs for 242 fatal liver disease cases and 242 matched controls compare the 90<sup>th</sup> to the 10<sup>th</sup> percentile of metabolite values based on the distribution in the controls; letting  $X_{90}$  and  $X_{10}$ , denote the 90<sup>th</sup> percentile and 10<sup>th</sup> percentile in controls, and  $\beta$  denoted the log(OR) from the conditional logistic regression model, the OR is  $e^{\beta(X_{90}-X_{10})}$

† Models adjusted for entry age (years), body mass index (kg/m<sup>2</sup>), smoking intensity (cigarettes/day), smoking duration (years), alcohol intake (none, <11.6 g/day, ≥11.6 g/day, or missing), self-reported diabetes status (yes or no), education (≤ or > elementary education), and run order

‡ n=228 (114 cases; 114 matched controls)

§ n=256 (128 cases; 128 matched controls)

|| Models additionally adjusted for coffee intake (none, <1, 1 to <2, 2 to <3, or ≥3 cups (8 oz) per day), fruit and vegetable intake (g/1000 kcal), red meat intake (g/1000 kcal), white meat intake (g/1000 kcal), processed meat intake (g/1000 kcal), fish intake (g/1000 kcal), saturated fat intake (g/1000 kcal), energy intake (kcal); subjects with missing FFQ data were grouped using an indicator variable for missing.

¶ P-value for  $X^2$  test obtained from conditional logistic regression model for a given metabolite (modeled on a continuous basis); all tests were two-sided.

Abbreviations: CI, confidence interval; OR, odds ratio; RT, retention time

**Supplementary Table 4.** Odds ratios and 95% confidence intervals for sensitivity analyses of incident liver cancer comparing men in the 90<sup>th</sup> and 10<sup>th</sup> percentiles, based on the distribution in controls, for top metabolites, using conditional logistic regression, and excluding those with: 1) a self-reported history of diabetes or a baseline fasting glucose level  $\geq 126$  mg/dl; 2) a seropositive hepatitis B or C test; or ICD9 code 155.2

| Chemical Class      | Metabolite                 | Exclusion Factor  |                   |                   |
|---------------------|----------------------------|-------------------|-------------------|-------------------|
|                     |                            | Diabetes †        | HCV or HBV ‡      | ICD9:155.2 §      |
| Alkaloid            | Trigonelline               |                   |                   |                   |
|                     | OR (95% CI) *              | 0.27 (0.08-0.87)  | 0.17 (0.05-0.56)  | 0.36 (0.19-0.66)  |
|                     | P-value ‖                  | 0.01              | 0.004             | 0.001             |
| Amino Acid          | Tyrosine                   |                   |                   |                   |
|                     | OR (95% CI) *              | 2.92 (0.85-10.02) | 7.18 (1.94-26.61) | 4.37 (2.12-9.00)  |
|                     | P-value ‖                  | 0.09              | 0.003             | <0.001            |
| Indoleamine         | Serotonin                  |                   |                   |                   |
|                     | OR (95% CI) *              | 0.17 (0.05-0.56)  | 0.34 (0.14-0.83)  | 0.33 (0.18-0.58)  |
|                     | P-value ‖                  | 0.003             | 0.02              | <0.001            |
| Dipeptide           | Leucyl-valine              |                   |                   |                   |
|                     | OR (95% CI) *              | 0.12 (0.03-0.45)  | 0.13 (0.04-0.42)  | 0.24 (0.13-0.45)  |
|                     | P-value ‖                  | 0.002             | <0.001            | <0.001            |
| Bile Acid           | Glycochenodeoxycholic acid |                   |                   |                   |
|                     | OR (95% CI) *              | 2.08 (0.86-5.04)  | 3.70 (1.49-9.20)  | 4.29 (2.30-8.00)  |
|                     | P-value ‖                  | 0.11              | 0.01              | <0.001            |
|                     | Glycocholic acid           |                   |                   |                   |
|                     | OR (95% CI) *              | 3.36 (1.19-9.55)  | 6.72 (2.20-20.60) | 5.70 (2.88-11.28) |
|                     | P-value ‖                  | 0.02              | <0.001            | <0.001            |
| Glycerophospholipid | LysoPC(15:0)               |                   |                   |                   |
|                     | OR (95% CI) *              | 0.14 (0.03-0.56)  | 0.22 (0.07-0.67)  | 0.17 (0.09-0.35)  |
|                     | P-value ‖                  | 0.01              | 0.01              | <0.001            |
|                     | LysoPC(P-16:0)             |                   |                   |                   |
|                     | OR (95% CI) *              | 0.29 (0.07-1.21)  | 0.16 (0.05-0.55)  | 0.21 (0.10-0.42)  |
|                     | P-value ‖                  | 0.09              | 0.004             | <0.001            |
|                     | LysoPC(18:2)               |                   |                   |                   |
|                     | OR (95% CI) *              | 0.27 (0.08-0.85)  | 0.08 (0.02-0.31)  | 0.24 (0.13-0.46)  |
|                     | P-value ‖                  | 0.02              | <0.001            | <0.001            |
| Purine derivative   | Hypoxanthine               |                   |                   |                   |
|                     | OR (95% CI) *              | 0.16 (0.04-0.63)  | 0.30 (0.11-0.86)  | 0.17 (0.08-0.36)  |
|                     | P-value ‖                  | 0.01              | 0.03              | <0.001            |

\* ORs for liver cancer cases and matched controls compare the 90<sup>th</sup> to the 10<sup>th</sup> percentile of metabolite values based on the distribution in the controls; letting  $X_{90}$  and  $X_{10}$ , denote the 90<sup>th</sup> percentile and 10<sup>th</sup> percentile in controls, and  $\beta$  denoted the  $\log(\text{OR})$  from the conditional logistic regression model, the OR is  $e^{\beta(X_{90}-X_{10})}$ . Models adjusted for entry age (years), body mass index (kg/m<sup>2</sup>), smoking intensity (cigarettes/day), smoking duration (years), alcohol intake (none, <11.6 g/day,  $\geq 11.6$  g/day, or missing), self-reported diabetes status (yes or no; *if applicable*), education ( $\leq$  or  $>$  elementary education), and run order

† Analysis includes n=184 (92 cases; 92 matched controls) without a self-reported history of diabetes or a baseline fasting glucose level  $\geq 126$  mg/dl; models are additionally adjusted for Homeostatic Model Assessment of Insulin Resistance (HOMA-IR)

‡ Analysis includes n=184 (92 cases; 92 matched controls) without a positive hepatitis B or C test

§ Analysis includes n=408 (204 cases; 204 matched controls) without a liver cancer diagnosis code of 155.2 (not specified as primary or secondary liver cancer)

‖ P-value for  $\chi^2$  test obtained from conditional logistic regression model for a given metabolite (modeled on a continuous basis); all tests were two-sided.

Abbreviations: CI, confidence interval; ICD, International Classification of Diseases; OR, odds ratio; RT, retention time



**Supplementary Table 5.** Odds ratios and 95% confidence intervals for sensitivity analyses of incident liver disease mortality comparing men in the 90<sup>th</sup> and 10<sup>th</sup> percentiles, based on the distribution in controls, for top metabolites, using conditional logistic regression, and excluding those with: (1) a self-reported history of diabetes or a baseline fasting glucose level  $\geq 126$  mg/dl; (2) or a seropositive hepatitis B or C test

| Chemical Class      | Metabolite                 | Exclusion Factor  |                   |
|---------------------|----------------------------|-------------------|-------------------|
|                     |                            | Diabetes †        | HCV or HBV ‡      |
| Alkaloid            | Trigonelline               |                   |                   |
|                     | OR (95% CI) *              | 0.17 (0.07-0.39)  | 0.23 (0.11-0.48)  |
|                     | P-value                    | 0.001             | <0.001            |
| Amino Acid          | Tyrosine                   |                   |                   |
|                     | OR (95% CI) *              | 2.98 (1.25-7.10)  | 4.71 (2.26-9.84)  |
|                     | P-value                    | 0.003             | <0.001            |
| Indoleamine         | Serotonin                  |                   |                   |
|                     | OR (95% CI) *              | 0.31 (0.16-0.61)  | 0.35 (0.19-0.65)  |
|                     | P-value                    | <0.001            | <0.001            |
| Dipeptide           | Leucyl-valine              |                   |                   |
|                     | OR (95% CI) *              | 0.29 (0.15-0.57)  | 0.34 (0.20-0.59)  |
|                     | P-value                    | <0.001            | <0.001            |
| Bile Acid           | Glycochenodeoxycholic acid |                   |                   |
|                     | OR (95% CI) *              | 4.83 (2.16-10.82) | 7.25 (3.32-15.82) |
|                     | P-value                    | <0.001            | <0.001            |
|                     | Glycocholic acid           |                   |                   |
|                     | OR (95% CI) *              | 2.79 (1.54-5.00)  | 5.10 (2.63-9.90)  |
|                     | P-value                    | <0.001            | <0.001            |
| Glycerophospholipid | LysoPC(15:0)               |                   |                   |
|                     | OR (95% CI) *              | 0.22 (0.10-0.49)  | 0.24 (0.12-0.48)  |
|                     | P-value                    | <0.001            | <0.001            |
|                     | LysoPC(P-16:0)             |                   |                   |
|                     | OR (95% CI) *              | 0.44 (0.19-1.01)  | 0.32 (0.16-0.65)  |
|                     | P-value                    | 0.05              | 0.002             |
|                     | LysoPC(18:2)               |                   |                   |
|                     | OR (95% CI) *              | 0.15 (0.05-0.39)  | 0.16 (0.07-0.35)  |
|                     | P-value                    | <0.001            | <0.001            |
| Purine derivative   | Hypoxanthine               |                   |                   |
|                     | OR (95% CI) *              | 0.38 (0.18-0.77)  | 0.38 (0.21-0.69)  |
|                     | P-value                    | 0.01              | 0.001             |

\* ORs for fatal liver disease cases and matched controls compare the 90<sup>th</sup> to the 10<sup>th</sup> percentile of metabolite values based on the distribution in the controls; letting  $X_{90}$  and  $X_{10}$  denote the 90<sup>th</sup> percentile and 10<sup>th</sup> percentile in controls, and  $\beta$  denoted the  $\log(\text{OR})$  from the conditional logistic regression model, the OR is  $e^{\beta(X_{90}-X_{10})}$ . Models are adjusted for entry age (years), body mass index ( $\text{kg}/\text{m}^2$ ), smoking intensity (cigarettes/day), smoking duration (years), alcohol intake (none, <11.6 g/day,  $\geq 11.6$  g/day, or missing), self-reported diabetes status (yes or no; *if applicable*), education ( $\leq$  or  $>$  elementary education), and run order

† Analysis includes n=330 (165 cases; 165 matched controls) without a self-reported history of diabetes or a baseline fasting glucose level  $\geq 126$  mg/dl; models are additionally adjusted for Homeostatic Model Assessment of Insulin Resistance (HOMA-IR)

‡ Analysis includes n=360 (180 cases; 180 matched controls) without a positive hepatitis B or C test

§ P-value for  $X^2$  test obtained from conditional logistic regression model for a given metabolite (modeled on a continuous basis); all tests were two-sided.

Abbreviations: CI, confidence interval; HBV, hepatitis B virus; HCV, hepatitis C virus; OR, odds ratio; RT, retention time

Supplementary Figures

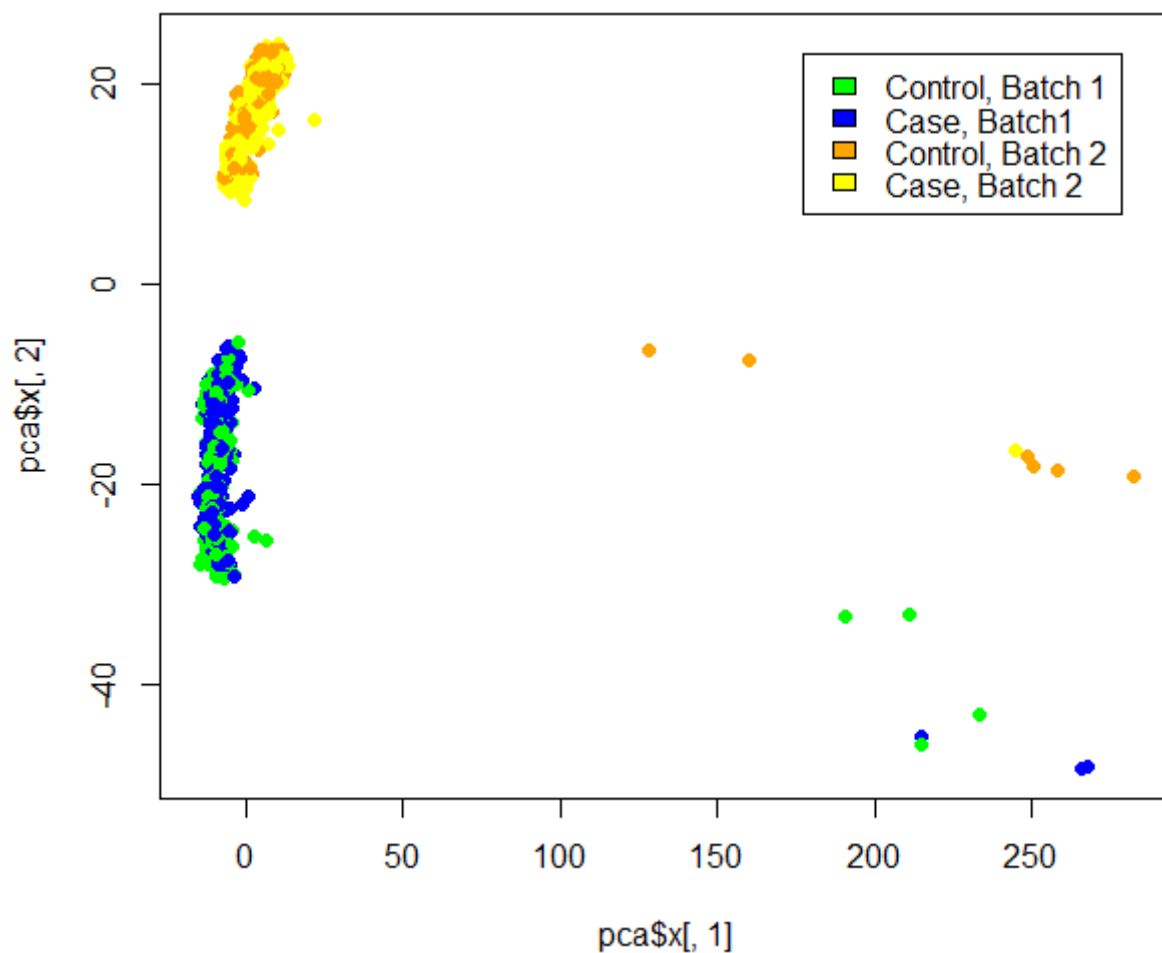

**Supplementary Figure 1.** PCA of 2,879 spectral features to identify outlying observations.

The PCA plot shows 14 observations that were excluded as extreme outliers ( $PC1 > 100$ ) by case status and batch. Controls in batch 1 and 2 are highlighted in green and orange, respectively; cases in batch 1 and 2 are highlighted in blue and yellow, respectively. Abbreviations: PCA, principle components analysis.

(A)

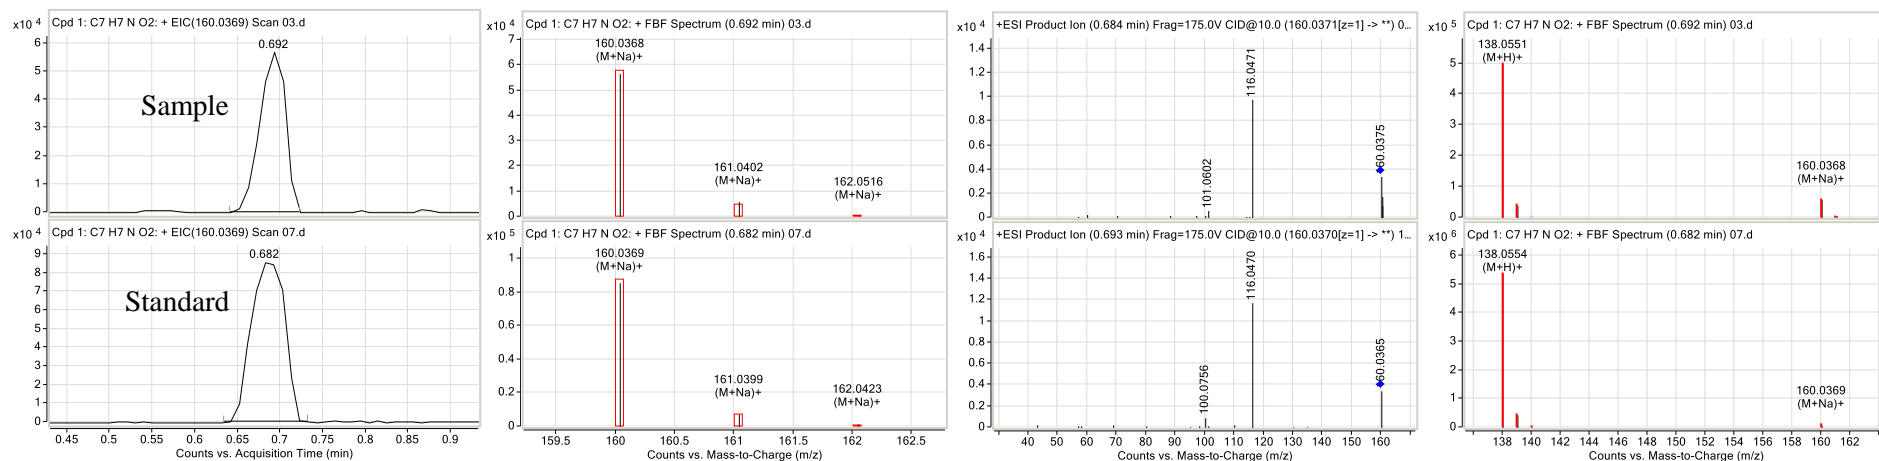

(B)

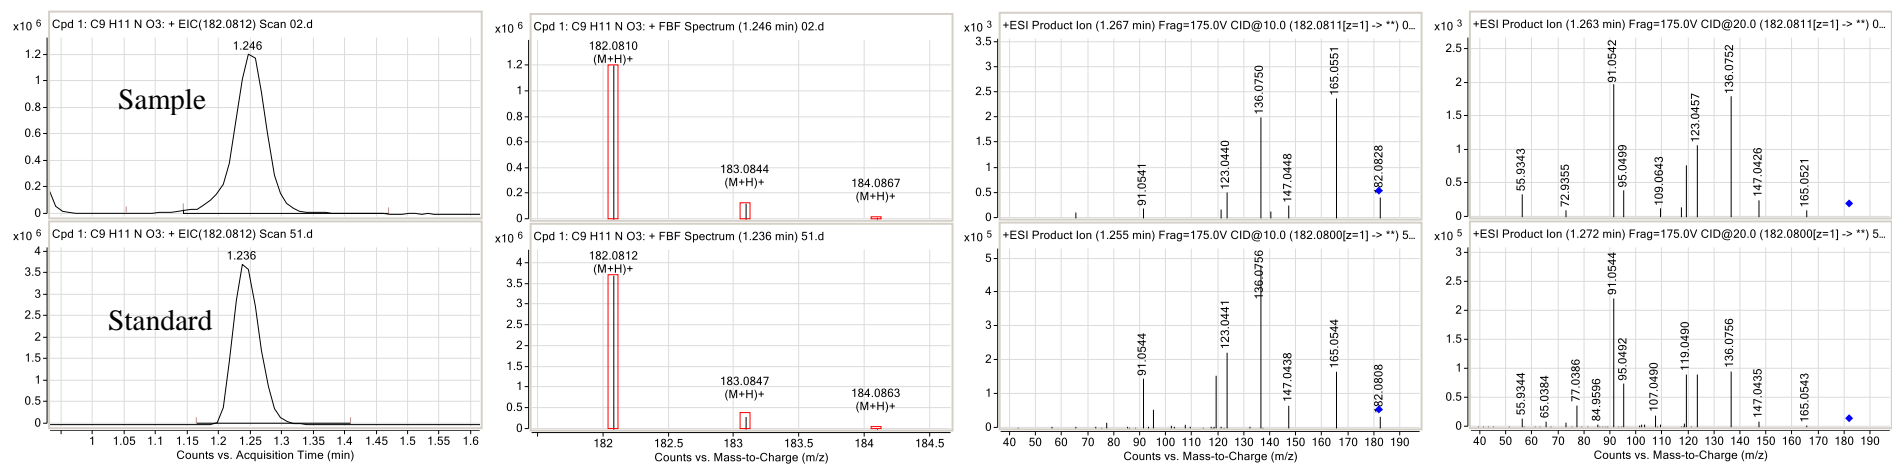

(C)

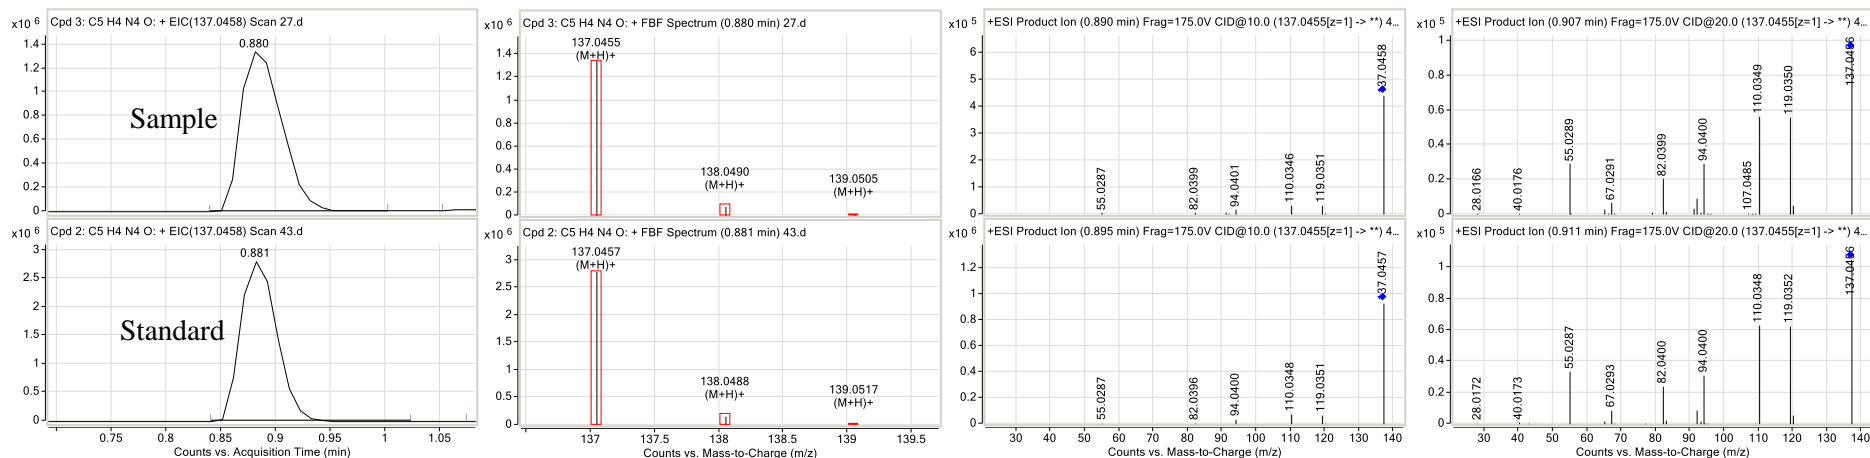

(D)

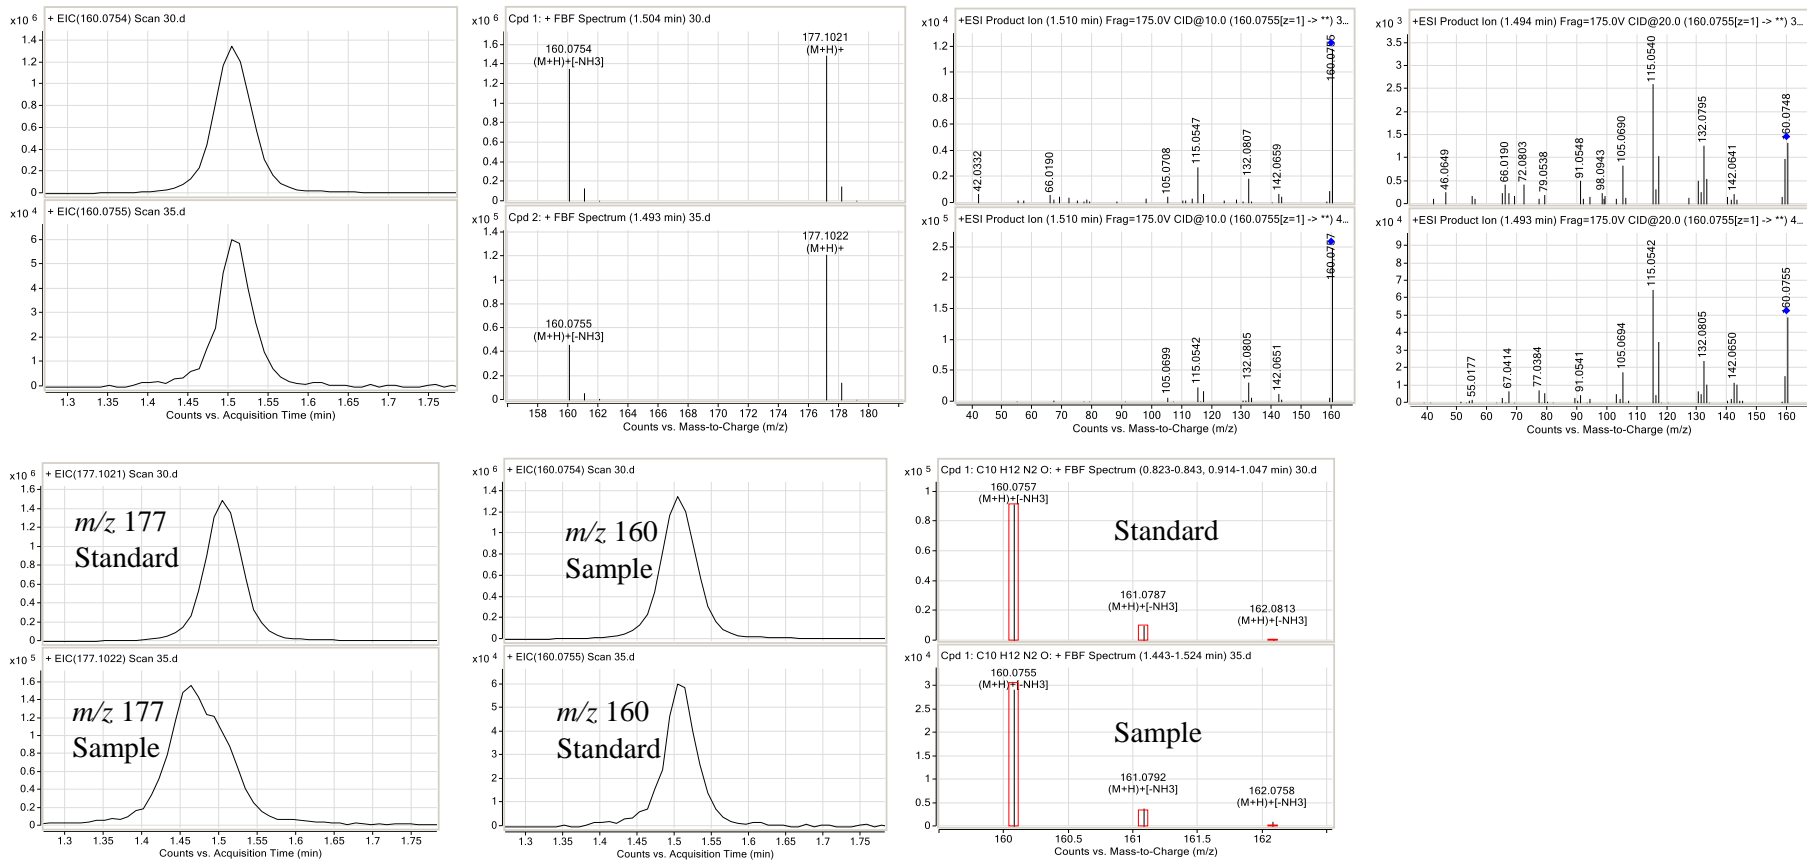

(E)

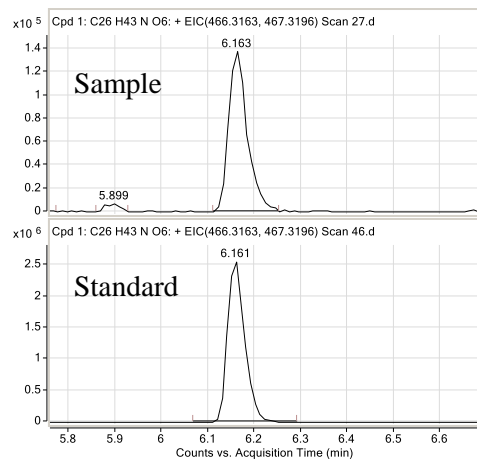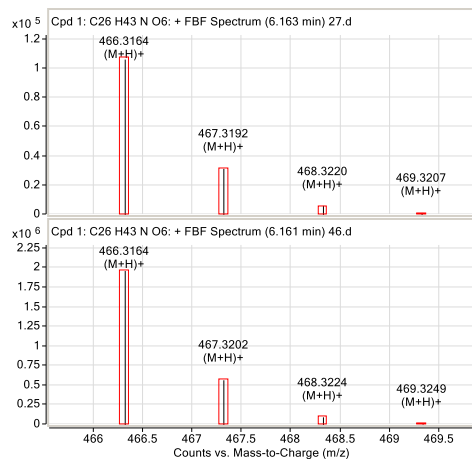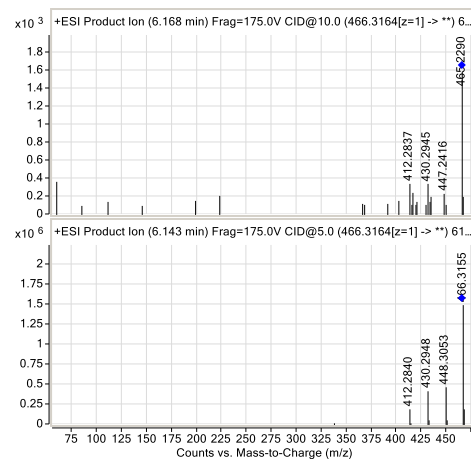

(F)

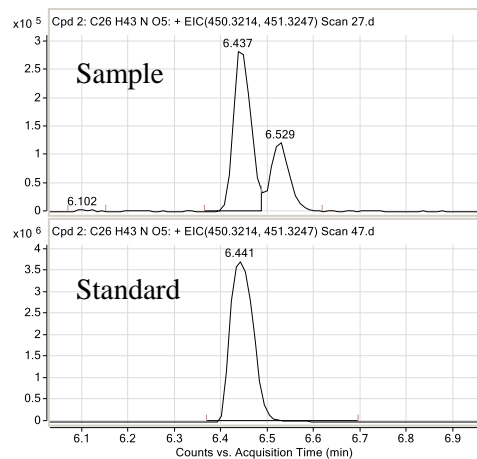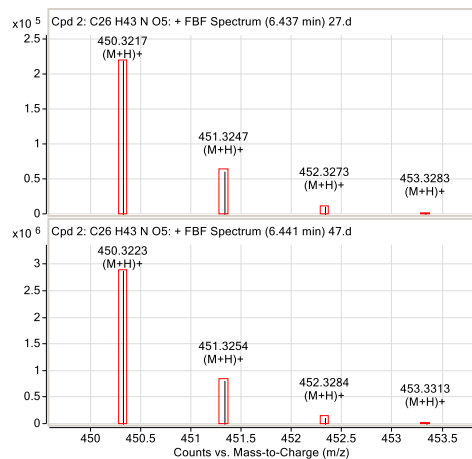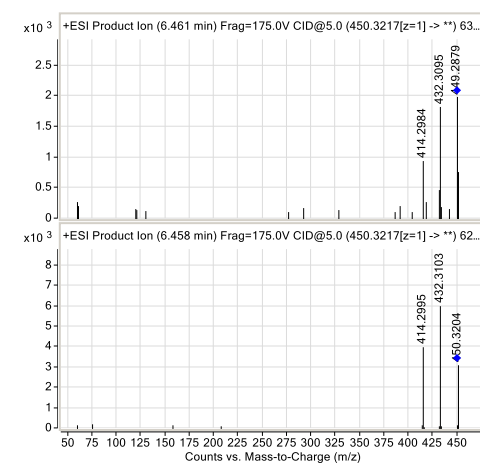

(G)

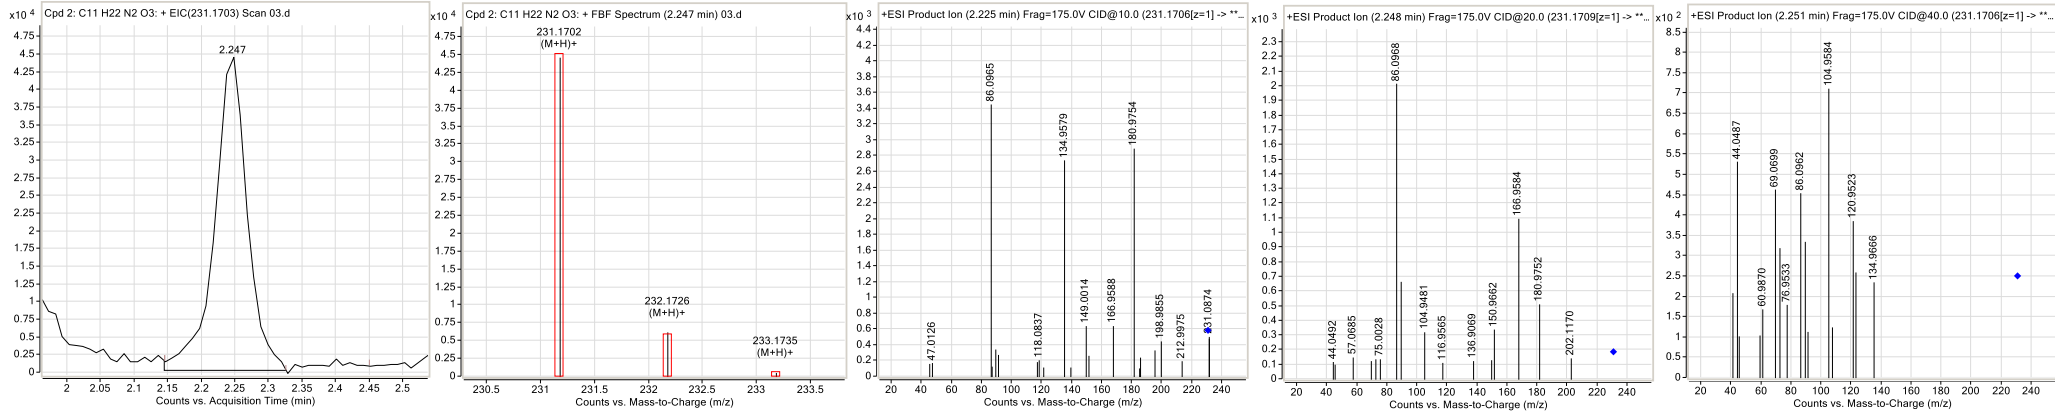

(H)

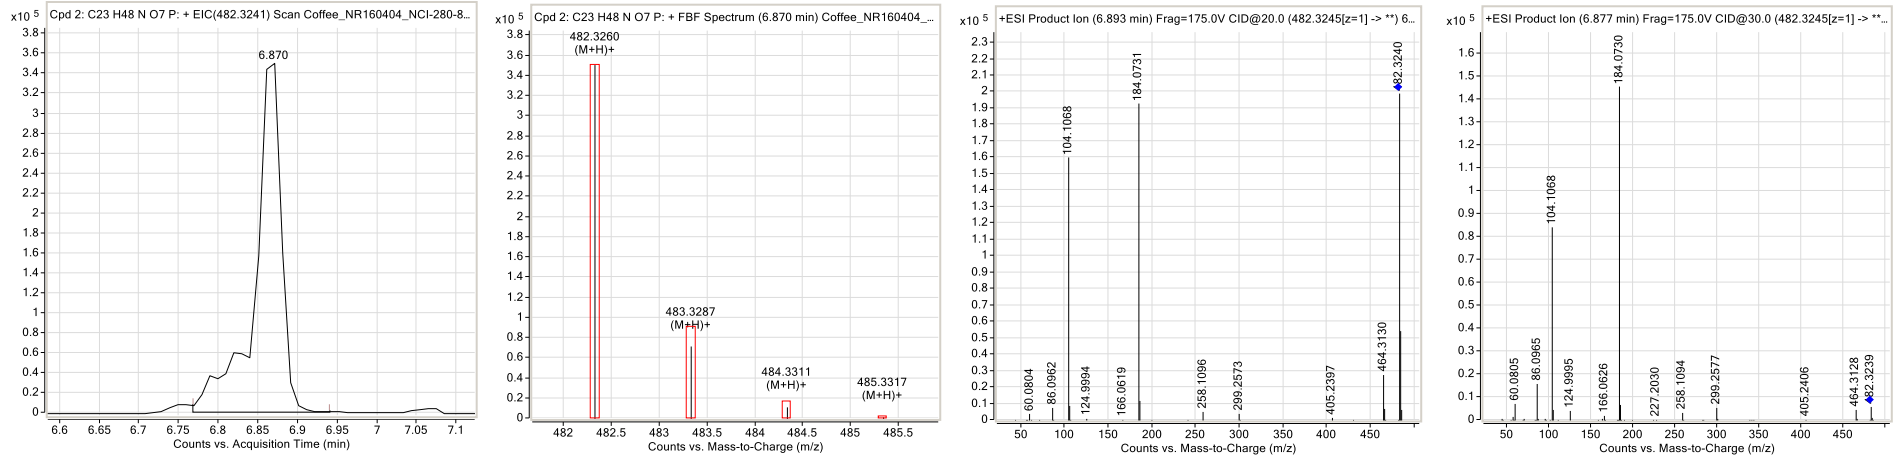

**(I)**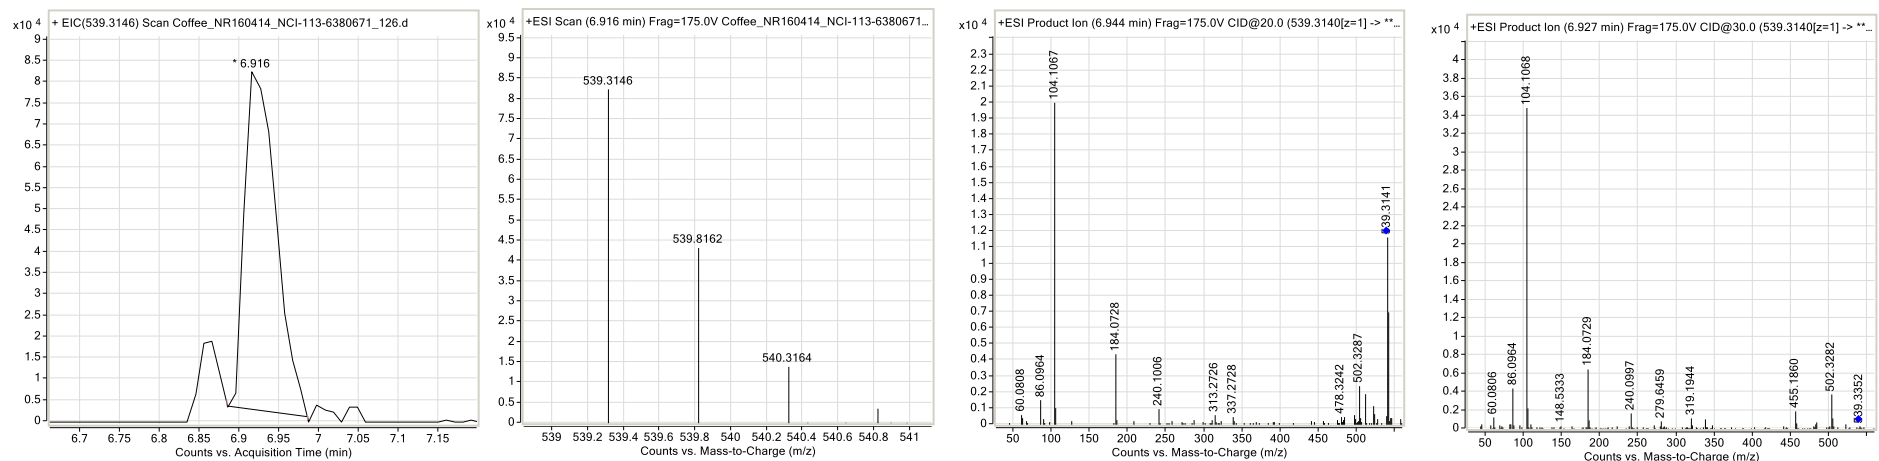**(J)**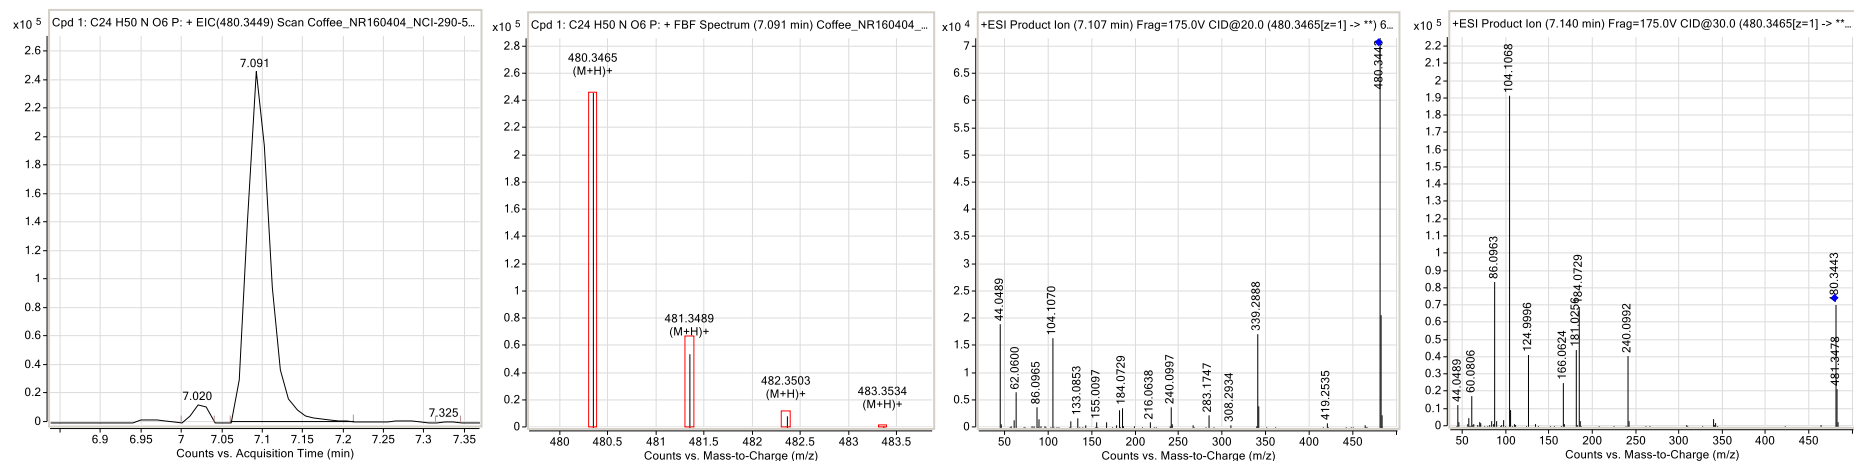

**Supplementary Figure 2.** Chromatograms and spectra from representative study samples and pure chemical standards from IROA Technologies' Mass Spectrometry Metabolite Library (when available).

Chromatograms and isotope patterns were generated with Find Compounds by Formula in Agilent MassHunter Qualitative Analysis B.06.00 SP1. Isotope patterns, highlighted with red rectangles, represent an isotope pattern calculated from the elemental composition (shown in the title of each spectra), and bars inside the rectangles show the observed isotope peaks. For MS/MS spectra, the precursor ion is indicated with a blue dot above the ion, with collision energy labeled on top of the spectra. **Panels A-J** correspond to the following compounds: **(A)** Trigonelline (HMDB0000875, trigonelline was detected as [M+Na]<sup>+</sup> (m/z 160.037). Chromatographic specificity was confirmed by identification with a pure chemical standard and by ensuring separation from the major potentially interfering compounds of identical elemental composition p-Aminobenzoic acid (RT: 2.33 min), anthranilic acid (RT: 3.52 min), and salicylamide (RT: 3.45 min)); **(B)** L-

Tyrosine (HMDB0000158, L-Tyrosine appeared as 2 strongly correlated (Pearson's  $r$ : 0.93) chromatographic peaks); **(C)** Hypoxanthine (HMDB0000157); **(D)** Serotonin (HMDB0000259, serotonin was detected as an in-source fragment  $[M-NH_3+H]^+$  ( $m/z$  160). The  $[M+H]^+$  ion of serotonin ( $m/z$  177) was not chromatographically separated from an interfering ion of identical mass but produced fragments specific to serotonin. The specificity of the ion  $m/z$  160 was confirmed by comparing its retention time and MS/MS fragments against those from a pure serotonin standard.); **(E)** Glycocholic acid (HMDB0000138); **(F)** Glycochenodeoxycholic acid (HMDB0000637); **(G)** Leu-Val or isomer; **(H)** LysoPC(15:0) (HMDB0010381); **(I)** LysoPC(18:2) (Several ions were detected, with  $[2M+H+K]^{2+}$  ( $m/z$  539.3146) being the most intense, from which MS/MS spectra were acquired.); **(J)** LysoPC(P-16:0) (HMDB0010407).



(A)

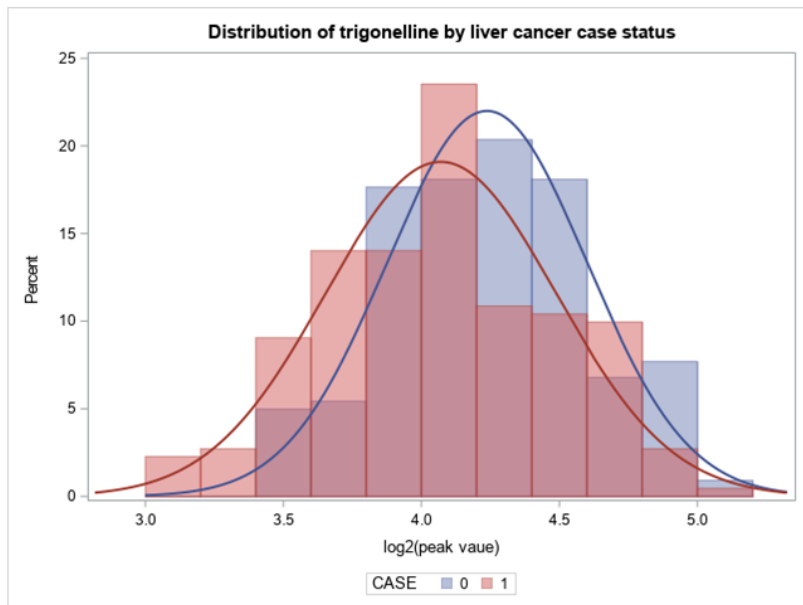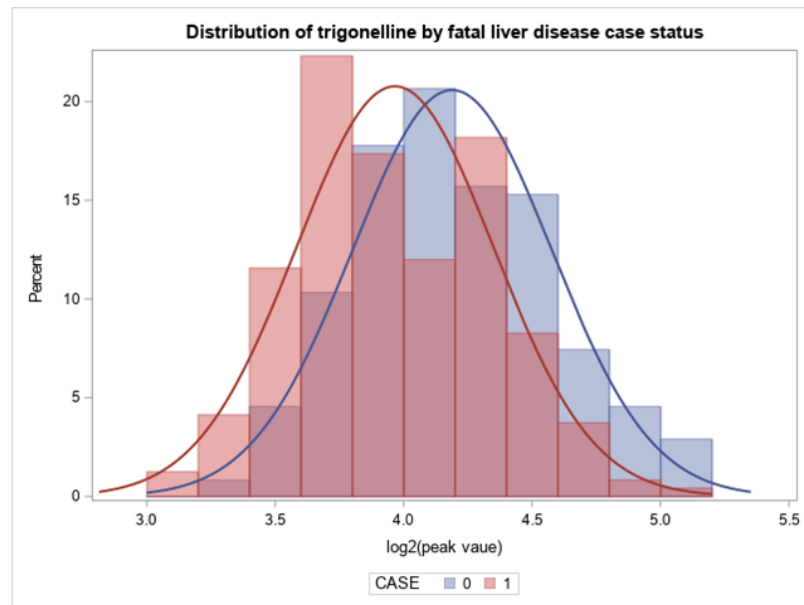

(B)

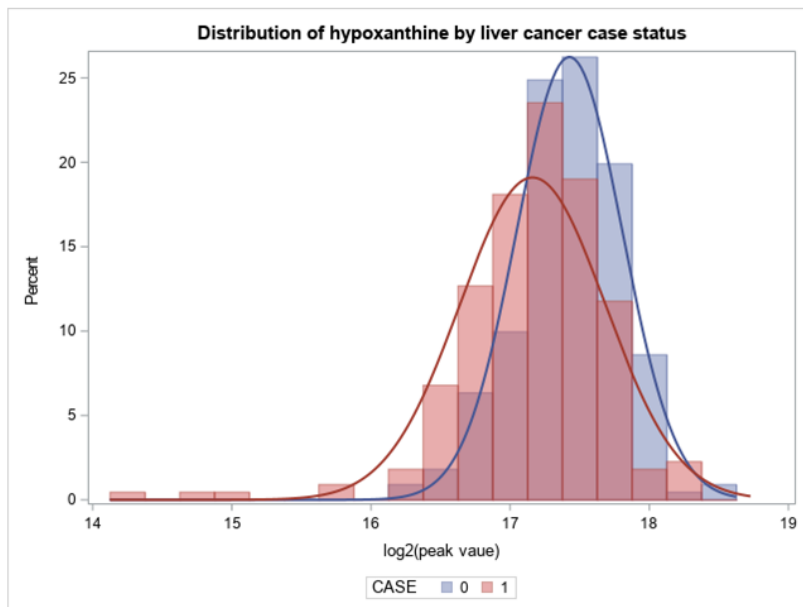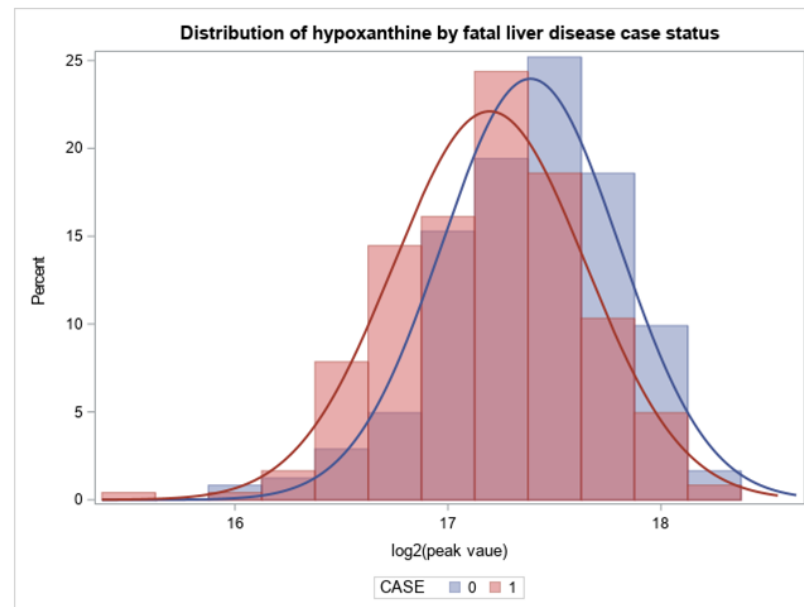

(C)

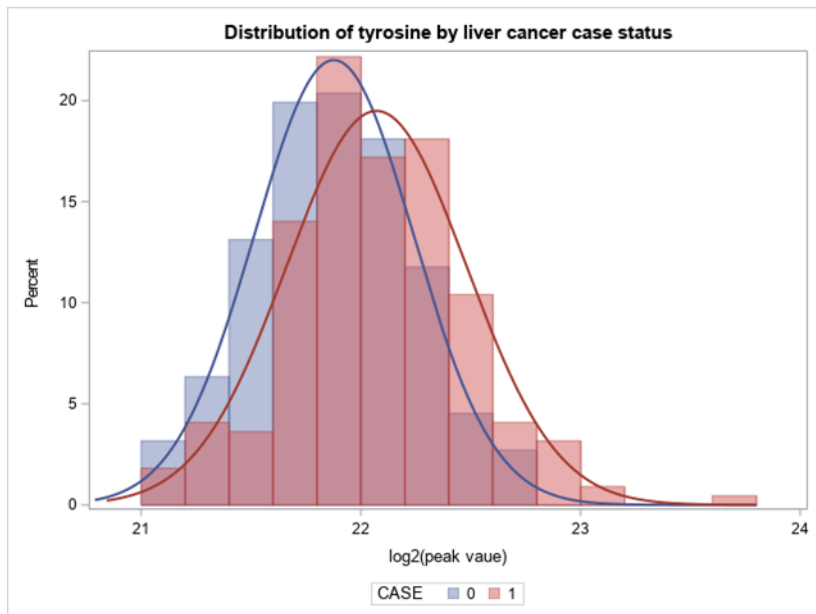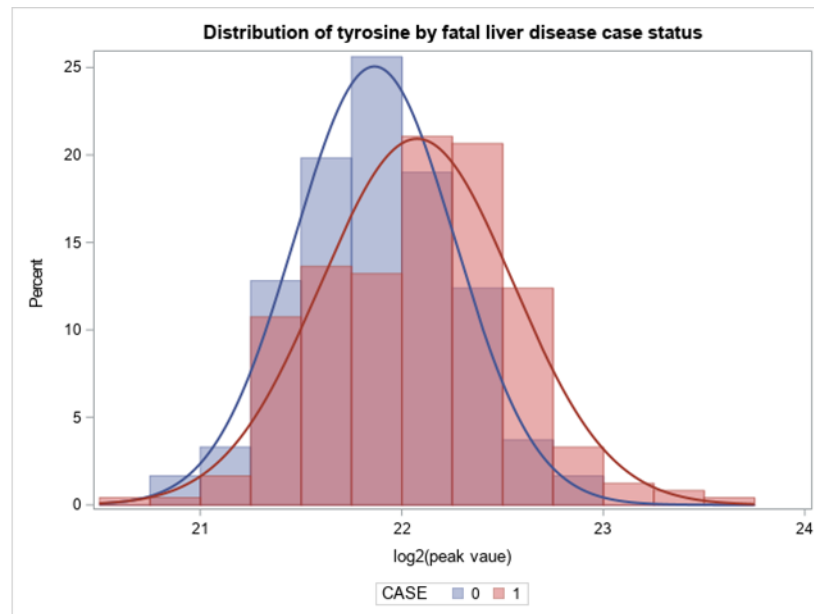

(D)

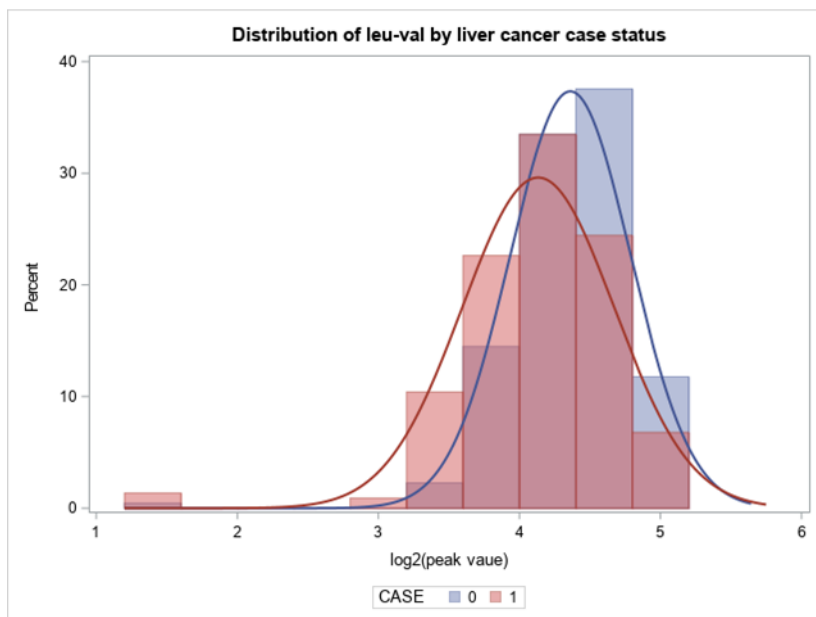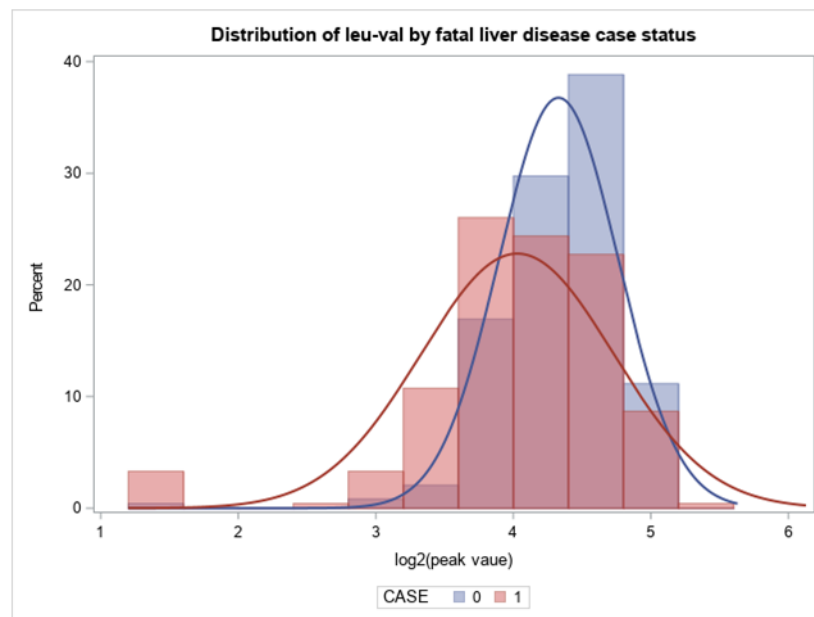

(E)

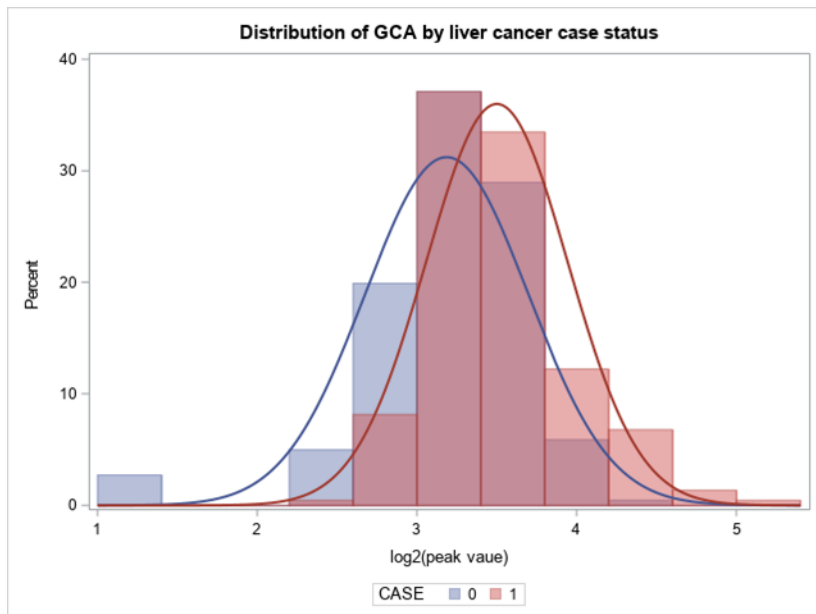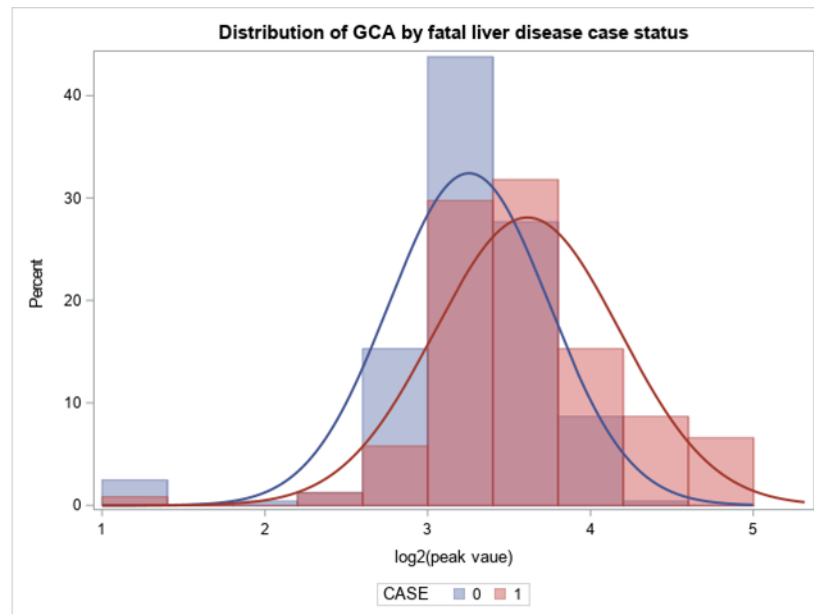

(F)

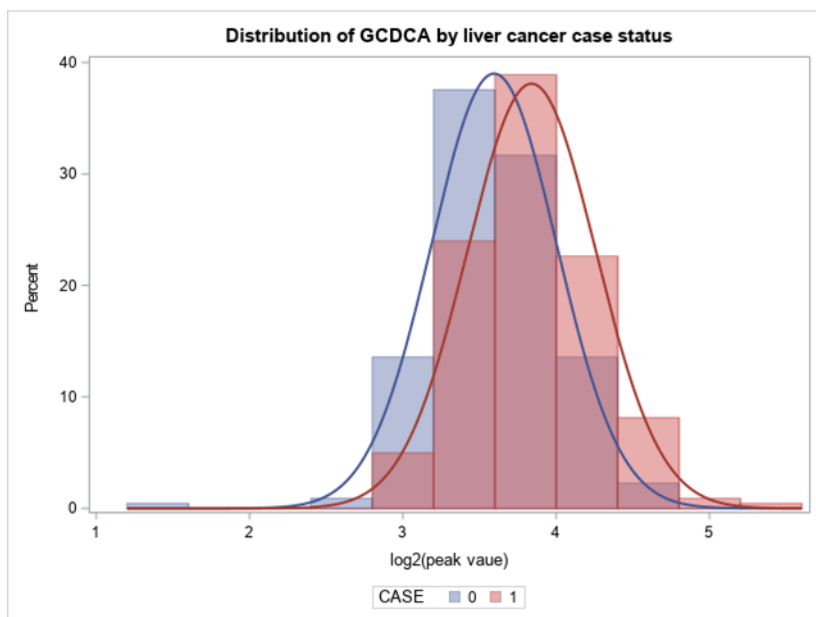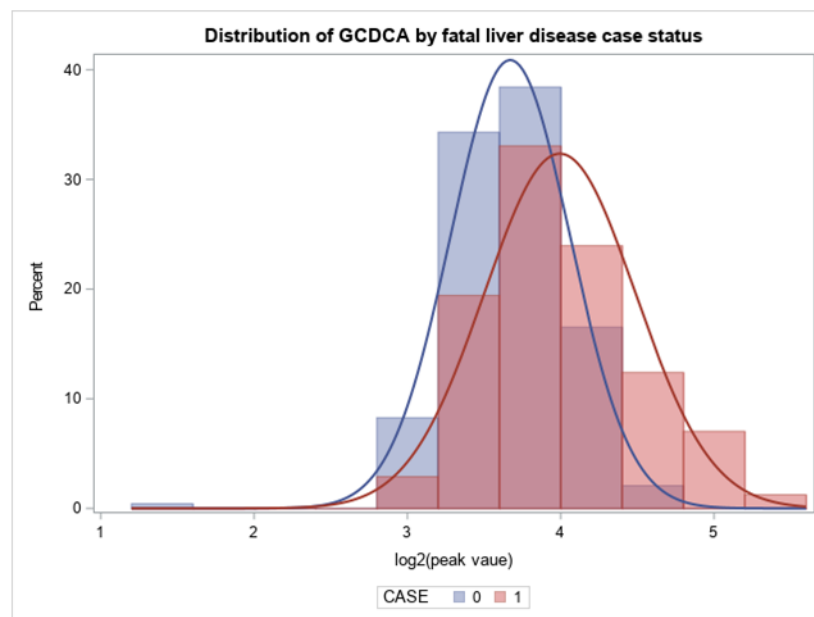

(G)

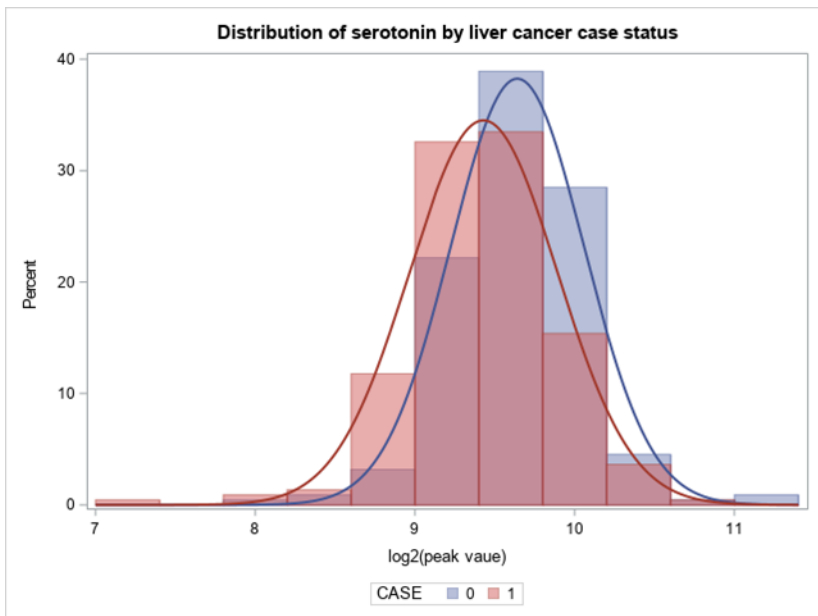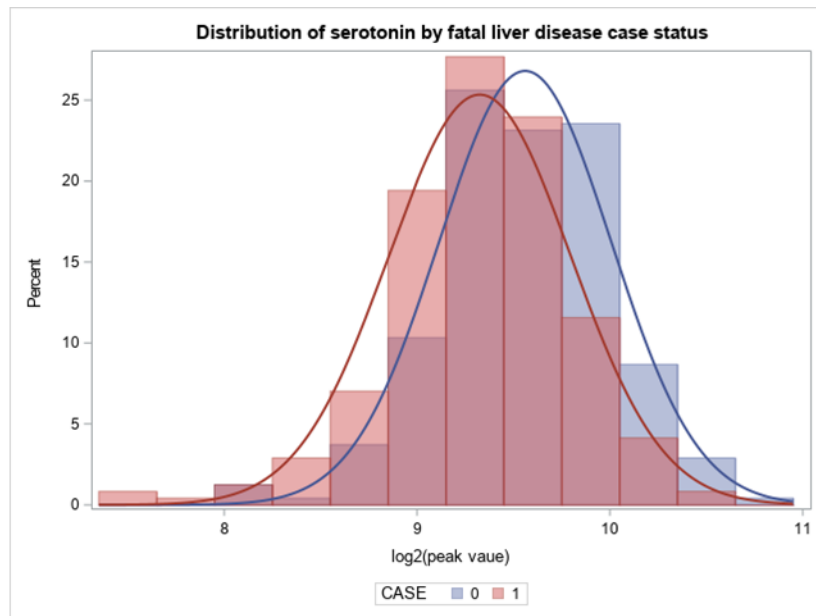

(H)

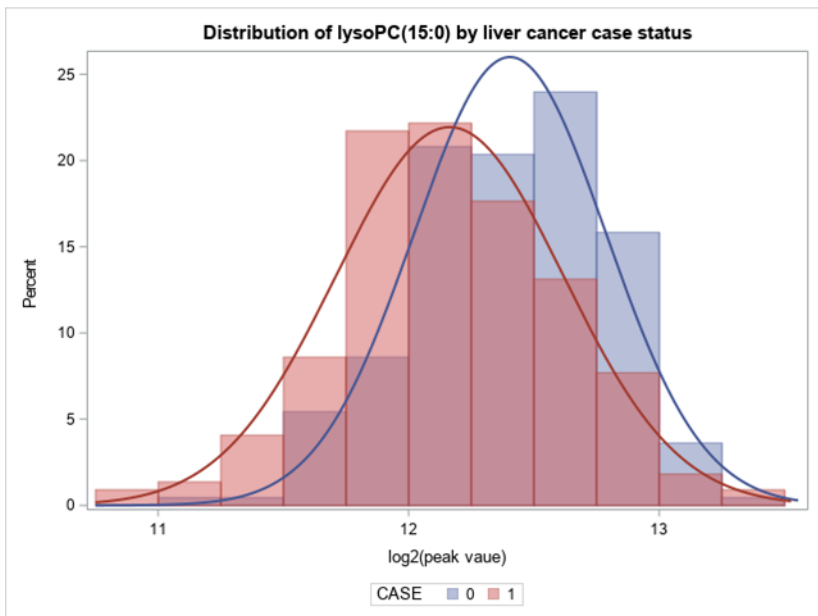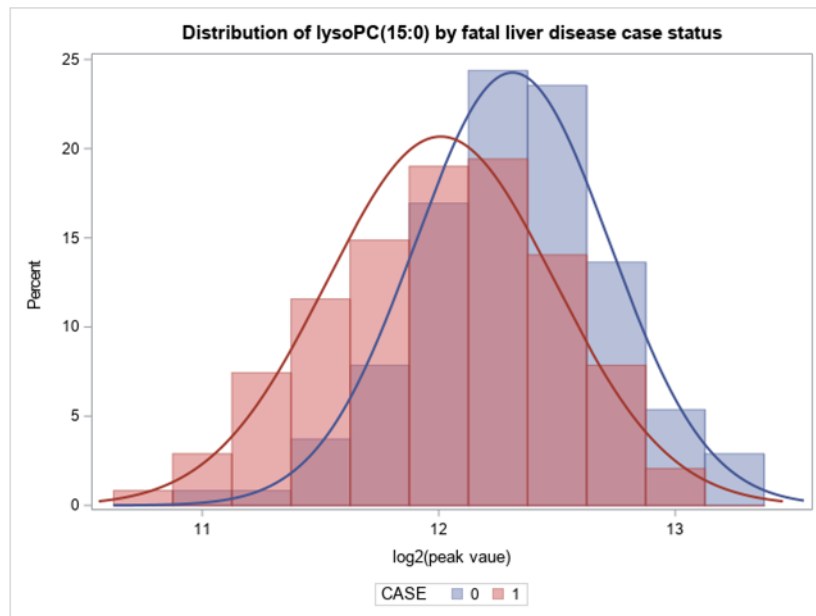

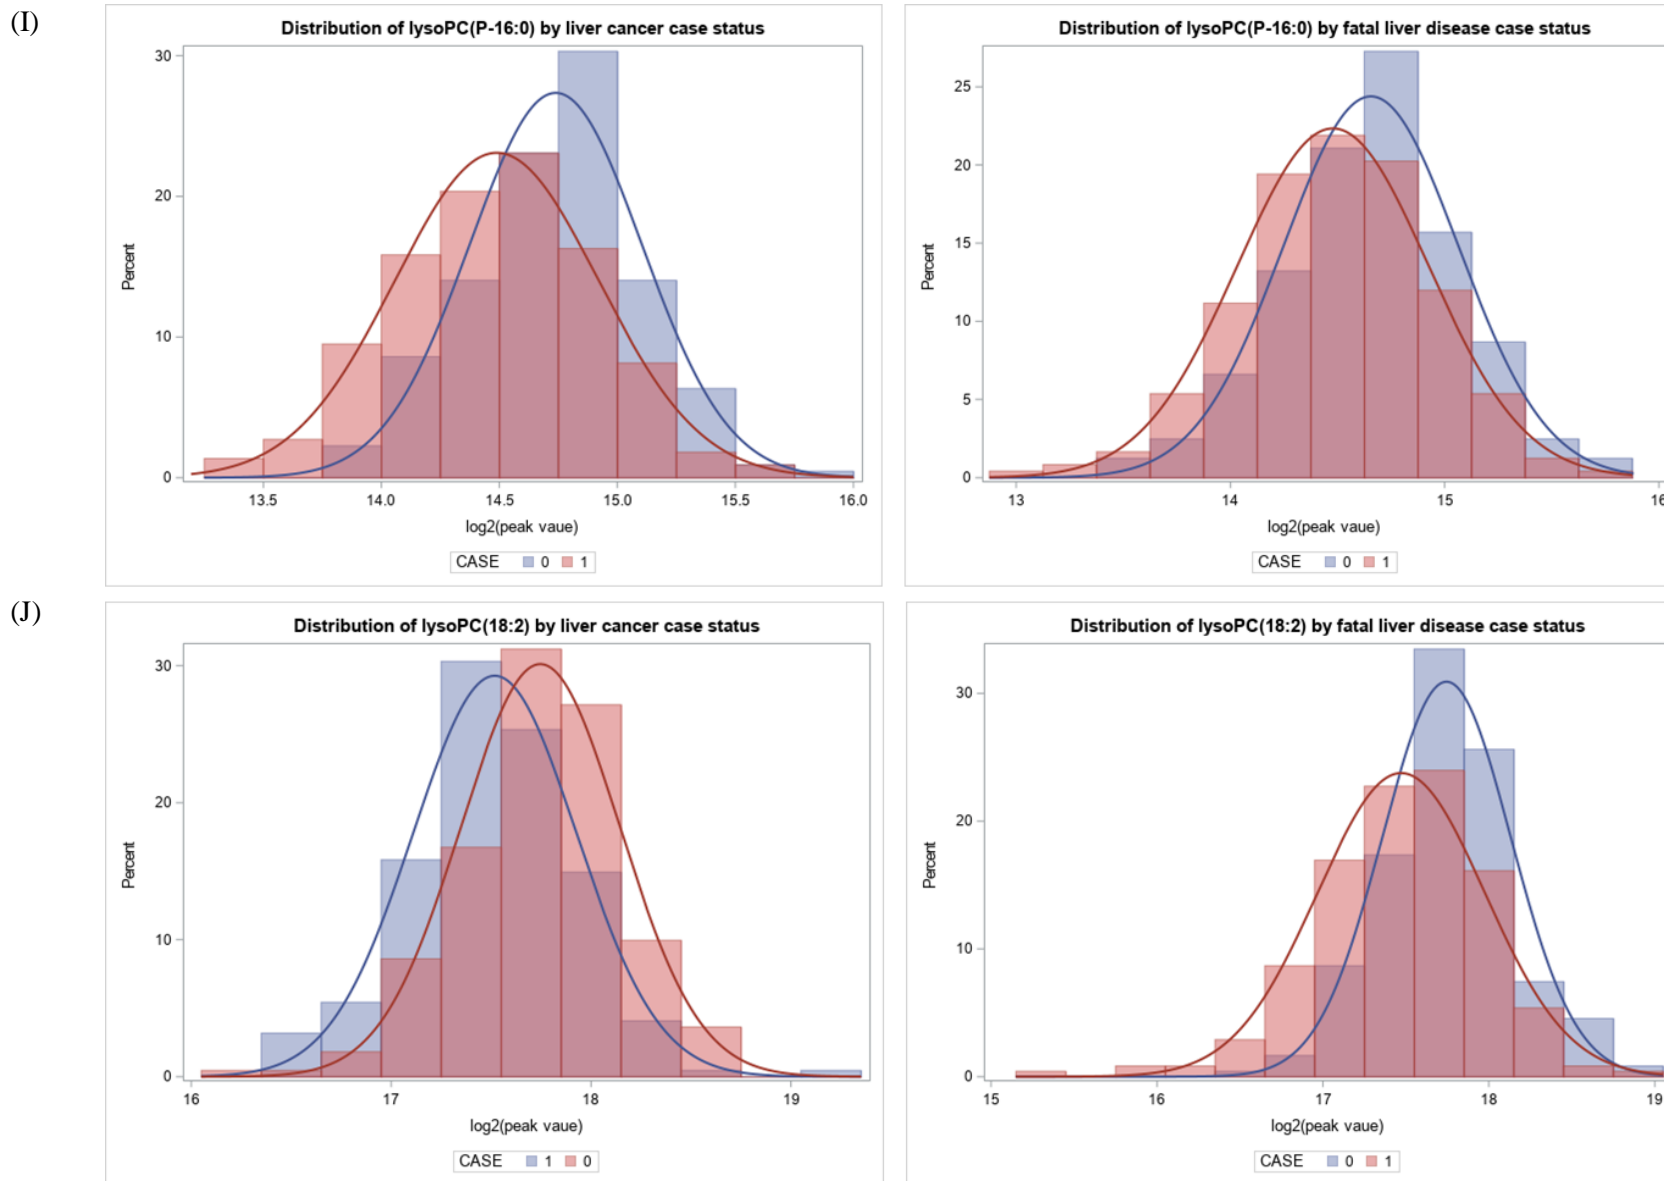

**Supplementary Figure 3.** Histograms of metabolites (log<sub>2</sub>-transformed) by case type and status.

Histograms illustrate the distribution of each identified metabolite (log<sub>2</sub>-transformed) among cases (red) and controls (blue) for the liver cancer and fatal liver disease case-control sets. **Panels A-J** correspond to the following compounds: **(A)** trigonelline, **(B)** hypoxanthine, **(C)** tyrosine, **(D)** leu-val, **(E)** glycocholic acid (GCA), **(F)** glycochenodeoxycholic acid (GCDCA), **(G)** serotonin, **(H)** lysoPC(15:0), **(I)** lysoPC(P-16:0), **(J)** lysoPC(18:2).

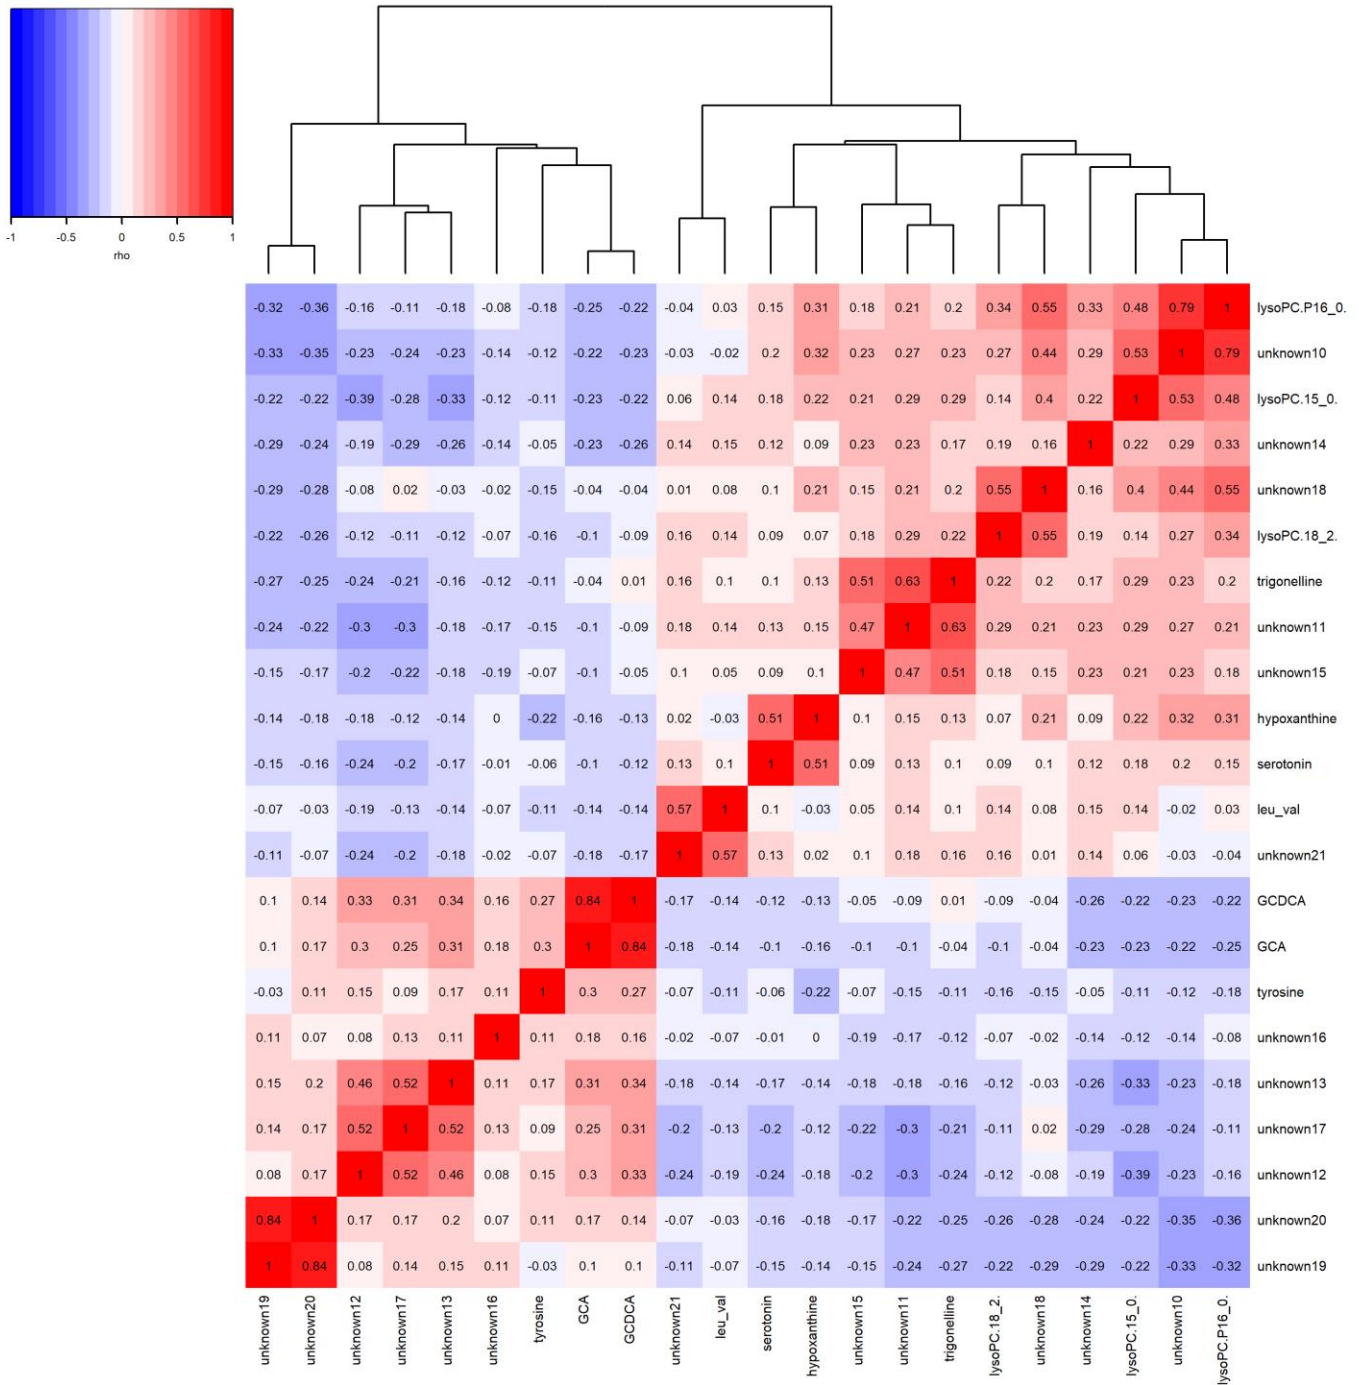

**Supplementary Figure 4.** Heatmap of metabolite correlations.

The heatmap was generated using hierarchical clustering of partial Spearman correlations, adjusted for case status and batch variables, between metabolite features that were statistically significantly associated with coffee drinking, liver cancer, and/or fatal liver disease.

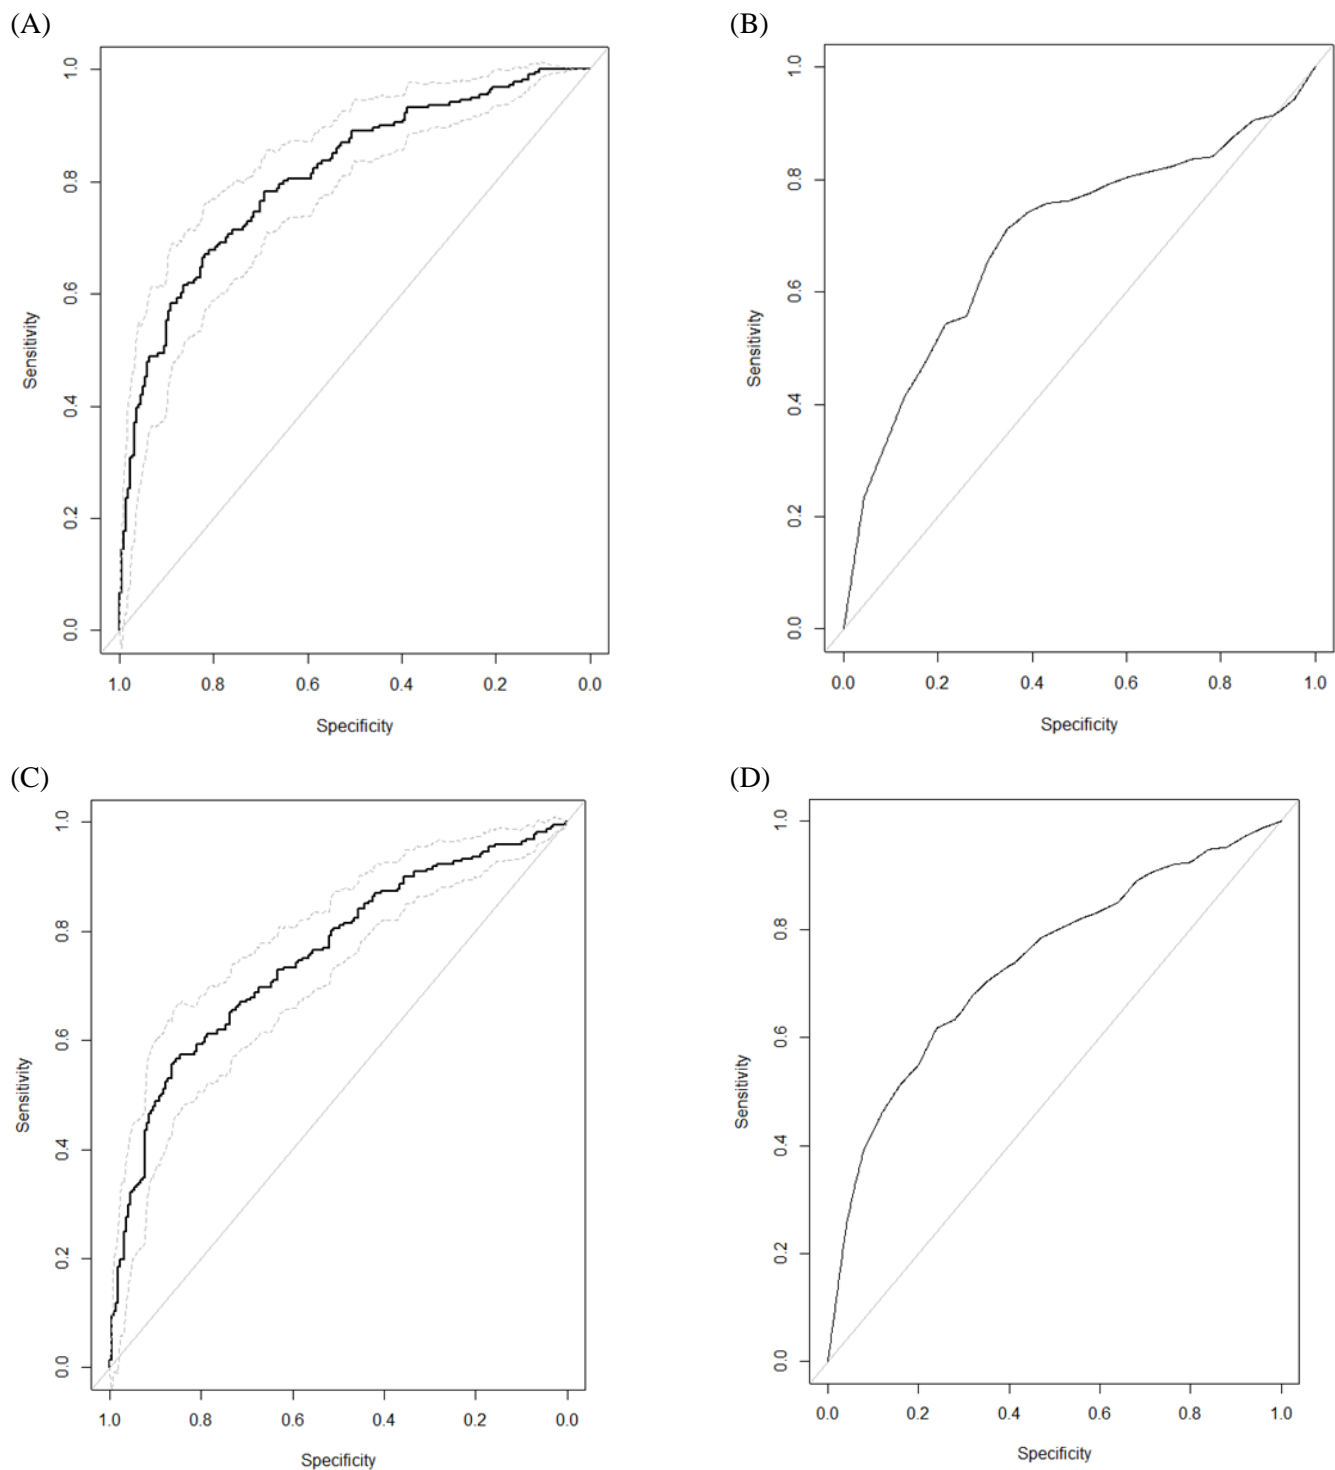

**Supplementary Figure 5.** aROC curve of winner's curse.

We evaluated whether the estimated aAUC and aROC may be biased because of the “winner’s curse” or using those metabolites most significantly associated with cancer. Panels A and B show the overall (aAUC = 0.81 (95% CI: 0.77-0.85) and unbiased estimate (aAUC = 0.72) for liver cancer, respectively. The liver cancer model includes glycocholic acid, leu-val, hypoxanthine, and lysoPC(18:2) Panels C and D show the overall (0.75 (95% CI: 0.71-0.80) and unbiased estimate (aAUC = 0.76) for liver disease mortality, respectively. The liver disease mortality model includes glycochenodeoxycholic acid, lysoPC(18:2), serotonin, and trigonelline.
